# Supplementary material for: Epoxinnamide: An Epoxy Cinnamoyl-Containing Nonribosomal Peptide from an Intertidal Mudflat-Derived Streptomyces sp.
Source: MDPI journal article supplement (doi:10.3390/md20070455), 2022-07-12
Supplement: s1 [file s1]

## *Supplementary Materials*

# **Epoxinamide: An Epoxy Cinnamoyl-Containing Nonribosomal Peptide from an Intertidal Mud-flat-Derived *Streptomyces* sp.**

**Sangwook Kang <sup>1</sup>, Jaeho Han <sup>1</sup>, Sung Chul Jang <sup>1</sup>, Joon Soo An <sup>1</sup>, Ilnam Kang <sup>2</sup>, Yun Kwon <sup>3</sup>, Sang-Jip Nam <sup>4</sup>, Sang Hee Shim <sup>1</sup>, Jang-Cheon Cho <sup>2</sup>, Sang Kook Lee <sup>1</sup> and Dong-Chan Oh <sup>1,\*</sup>**

<sup>1</sup> Natural Products Research Institute, College of Pharmacy, Seoul National University, Seoul 08826, Korea; ksw1657@snu.ac.kr (S.K.); gh03292@snu.ac.kr (J.H.); tobok95@snu.ac.kr (S.C.J.); ahnjun-soo@snu.ac.kr (J.S.A.); sanghee\_shim@snu.ac.kr (S.H.S); sklee61@snu.ac.kr (S.K.L)

<sup>2</sup> Department of Biological Sciences, Inha University, Incheon 22212, Korea; ikang@inha.ac.kr (I.K.); chojc@inha.ac.kr (J.-C.C.)

<sup>3</sup> Research Institute of Pharmaceutical Sciences, College of Pharmacy, Kyungpook National University, Daegu 41566, Korea; yunkwon@knu.ac.kr

<sup>4</sup> Department of Chemistry and Nanoscience, Ewha Womans University, Seoul 03760, Korea; sjnam@ewha.ac.kr

\* Correspondence: dongchanoh@snu.ac.kr; Tel.: +82-880-2491; Fax: +82-762-8322

# Contents

|                                                                                                                                                                                                           |     |
|-----------------------------------------------------------------------------------------------------------------------------------------------------------------------------------------------------------|-----|
| <b>Figure S1.</b> Biosynthetic mechanisms of (a) nonribosomal peptide synthetase (NRPS) and (b) polyketide synthetase (PKS). .....                                                                        | S4  |
| <b>Figure S2.</b> Structures of CCNPs from actinomycetes. ....                                                                                                                                            | S5  |
| <b>Figure S3.</b> HRESIMS data of the epoxinnamide (1).....                                                                                                                                               | S6  |
| <b>Figure S4.</b> <sup>1</sup> H NMR (800 MHz, DMSO- <i>d</i> <sub>6</sub> ) spectrum of the epoxinnamide (1). ....                                                                                       | S7  |
| <b>Figure S5.</b> <sup>13</sup> C NMR (200 MHz, DMSO- <i>d</i> <sub>6</sub> ) spectrum of the epoxinnamide (1).....                                                                                       | S8  |
| <b>Figure S6.</b> HSQC NMR (800 MHz, DMSO- <i>d</i> <sub>6</sub> ) spectrum of the epoxinnamide (1). ....                                                                                                 | S9  |
| <b>Figure S7.</b> Structure comparison between epoxinnamide (1) and nyuzenamide C.....                                                                                                                    | S10 |
| <b>Table S1.</b> <sup>1</sup> H (800 MHz, DMSO- <i>d</i> <sub>6</sub> ) and <sup>13</sup> C NMR (200 MHz, DMSO- <i>d</i> <sub>6</sub> ) comparison table between epoxinnamide (1) and nyuzenamide C. .... | S10 |
| <b>Figure S8.</b> COSY NMR (800 MHz, DMSO- <i>d</i> <sub>6</sub> ) spectrum of the epoxinnamide (1). ....                                                                                                 | S13 |
| <b>Figure S9.</b> TOCSY NMR (800 MHz, DMSO- <i>d</i> <sub>6</sub> ) spectrum of the epoxinnamide (1).....                                                                                                 | S14 |
| <b>Figure S10.</b> HMBC NMR (800 MHz, DMSO- <i>d</i> <sub>6</sub> ) spectrum of the epoxinnamide (1). ....                                                                                                | S15 |
| <b>Figure S11.</b> ROESY NMR (800 MHz, DMSO- <i>d</i> <sub>6</sub> ) spectrum of the epoxinnamide (1).....                                                                                                | S16 |
| <b>Figure S12.</b> 16S rRNA gene sequence-based neighbor-joining tree showing the phylogenetic position of the strain OID44.....                                                                          | S17 |
| <b>Figure S13.</b> LC/MS chromatograms of L- and D-FDAA derivatives of amino acids in the epoxinnamide (1). ....                                                                                          | S18 |
| <b>Table S2.</b> LC/MS analysis of L- and D-FDAA derivatives of amino acids in the epoxinnamide (1).....                                                                                                  | S19 |
| <b>Figure S14.</b> LC/MS chromatograms of D-FDAA derivatives of threonine in the epoxinnamide (1) and authentic threonines. ....                                                                          | S19 |
| <b>Figure S15.</b> <sup>1</sup> H, <sup>13</sup> C, and <sup>3</sup> J <sub>H2-H3</sub> values of hydroxyleucine moiety in various natural products.....                                                  | S20 |
| <b>Table S3.</b> Experimental and calculated chemical shifts of the partial structure of the epoxinnamide (1). ....                                                                                       | S23 |
| <b>Figure S16.</b> Results of DP4 calculation for the partial structure of the epoxinnamide (1). ....                                                                                                     | S24 |
| <b>Table S4.</b> AntiSMASH output table of the <i>Streptomyces</i> sp. OID44. ....                                                                                                                        | S25 |
| <b>Table S5.</b> Deduced functions of ORFs in the epoxinnamide (1) biosynthetic gene cluster from the <i>Streptomyces</i> sp. OID44. ....                                                                 | S27 |

|                                                                                                                                                                                                                                  |     |
|----------------------------------------------------------------------------------------------------------------------------------------------------------------------------------------------------------------------------------|-----|
| <b>Figure S17.</b> Biosynthetic functions of the cytochrome P450s and the thioesterase domains in epoxinamide (1), nyuzenamide C, skyllamycin A, atratumycin, and telomycin. ....                                                | S29 |
| <b>Figure S18.</b> Sequence alignment of the Epc-TE with the other TEs.....                                                                                                                                                      | S30 |
| <b>Figure S19.</b> Proposed structural models of thioesterase domains, active site residues surrounding catalytic Ser residue, and key active sites for dual function of (a) Epc-TE, (b) Dml-TE, (c) Atr-TE, and (d) Tel-TE..... | S31 |
| <b>Figure S20.</b> Sequence alignment of the EpcB with the other cytochrome P450s. ....                                                                                                                                          | S32 |
| <b>Figure S21.</b> Phylogenetic analysis of the cytochrome P450 $\beta$ -hydroxylases which catalyze $\beta$ -hydroxylation of amino acid. ....                                                                                  | S33 |
| <b>Table S6.</b> List of the cytochrome P450 $\beta$ -hydroxylases implicated in the $\beta$ -hydroxylation of amino acid residues. ....                                                                                         | S34 |
| <b>Figure S22.</b> Phylogenetic tree and table of the ketosynthases in BGC of youssoufene and CCNPs....                                                                                                                          | S35 |
| <b>Table S7.</b> Quinone reductase assay data of nyuzenamide C and epoxinamide (1). ....                                                                                                                                         | S36 |
| <b>Table S8.</b> Cell viability data of nyuzenamide C and epoxinamide (1). ....                                                                                                                                                  | S36 |
| <b>Table S9.</b> In vitro capillary tube formation assay data of nyuzenamide C and epoxinamide (1).....                                                                                                                          | S36 |
| <b>References</b> .....                                                                                                                                                                                                          | S37 |

**Figure S1.** Biosynthetic mechanisms of (a) nonribosomal peptide synthetase (NRPS) and (b) polyketide synthetase (PKS) [1]. Wavy bonds at the PCP and ACP domains represent the 4'-phosphopantetheine groups. ATP = adenosine triphosphate, PP<sub>i</sub> = pyrophosphate, AMP = adenosine monophosphate, CoA = coenzyme A, R<sub>1</sub>, R<sub>2</sub>, R<sub>3</sub> = amino acid residues, R = poly-β-keto group.

(a)

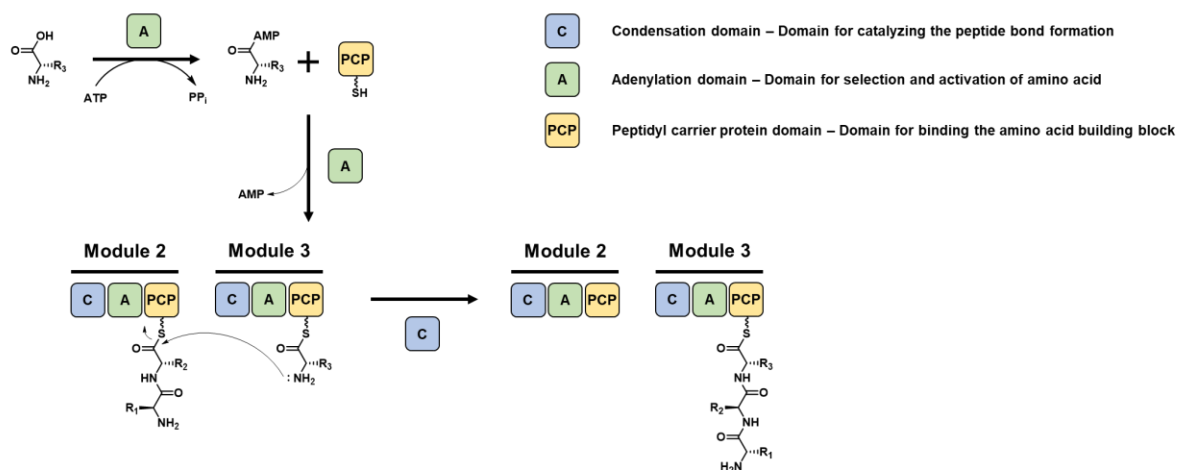

(b)

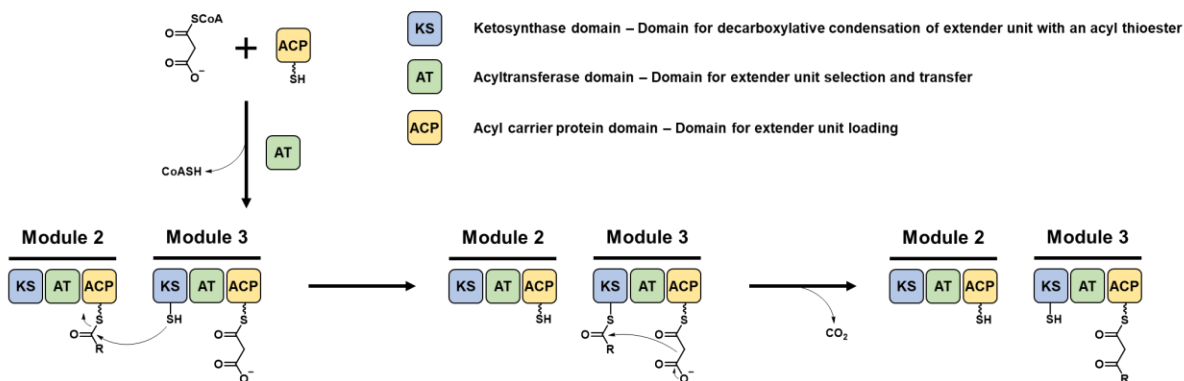

**Figure S2.** Structures of CCNPs from actinomycetes [2-21]. Cinnamoyl moieties are highlighted by red color.

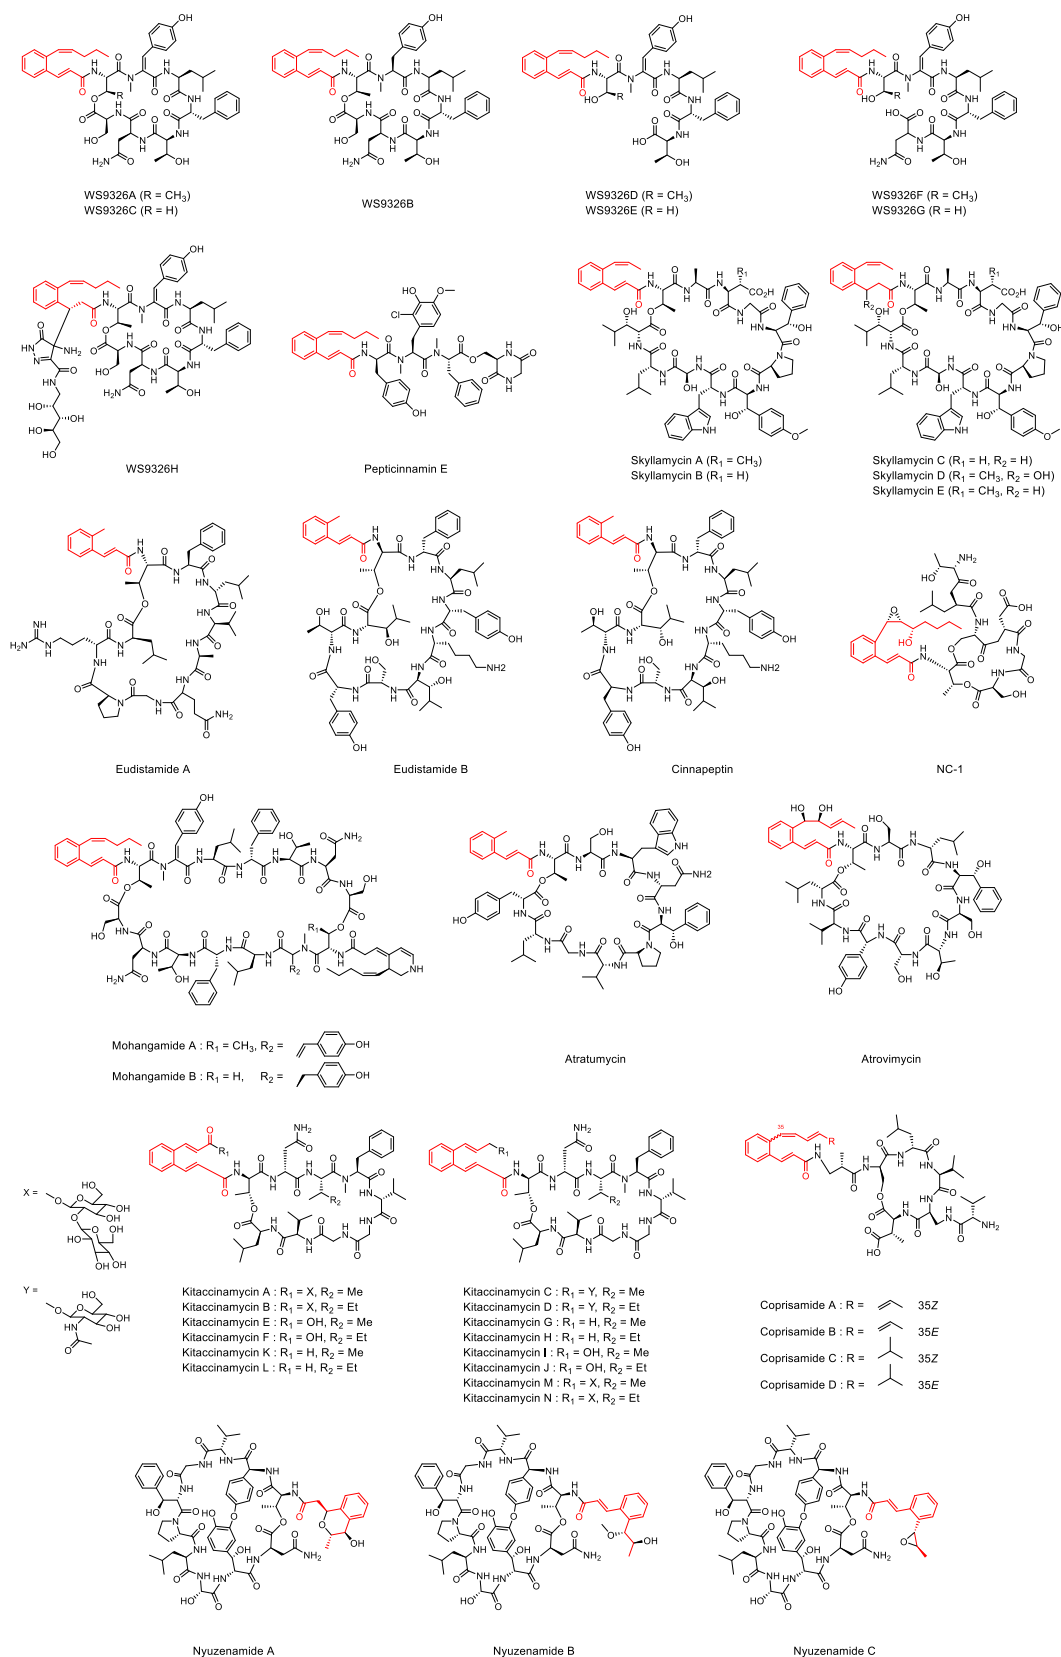

**Figure S3.** HRESIMS data of the epoxinnamide (**1**).

Spectrum from OID44\_1297.wiff (sample 1) - OID44\_1297, Experiment 1, +TOF MS (100 - 2000) from 0.670 min

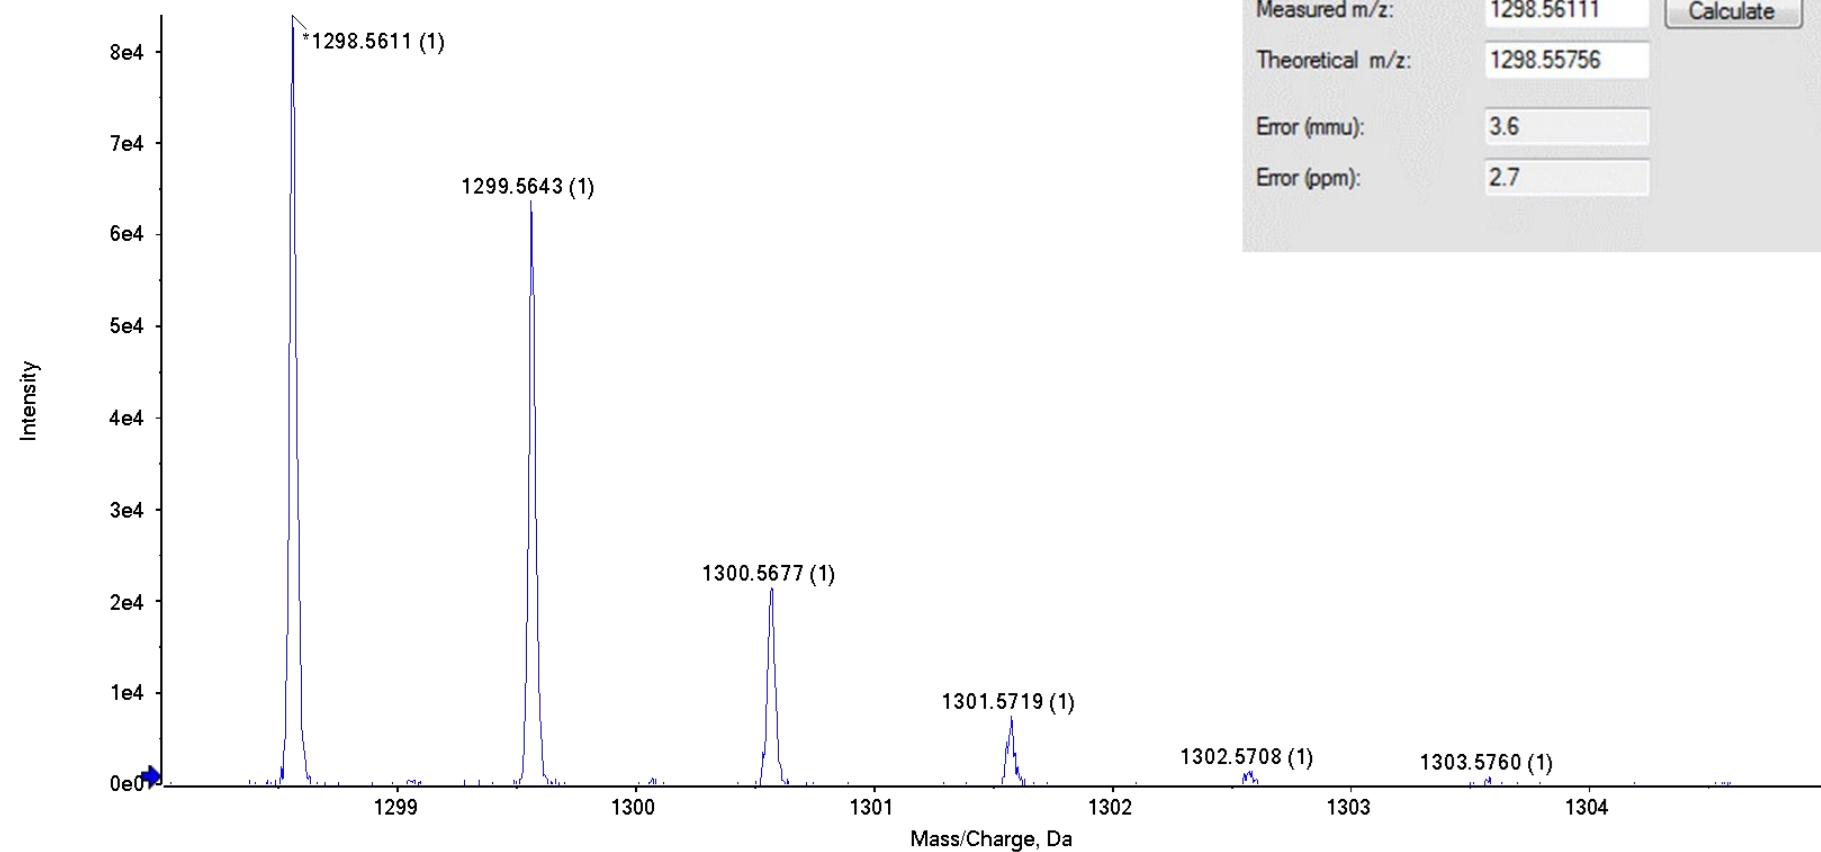

**Figure S4.**  $^1\text{H}$  NMR (800 MHz,  $\text{DMSO-}d_6$ ) spectrum of the epoxinnamide (**1**).

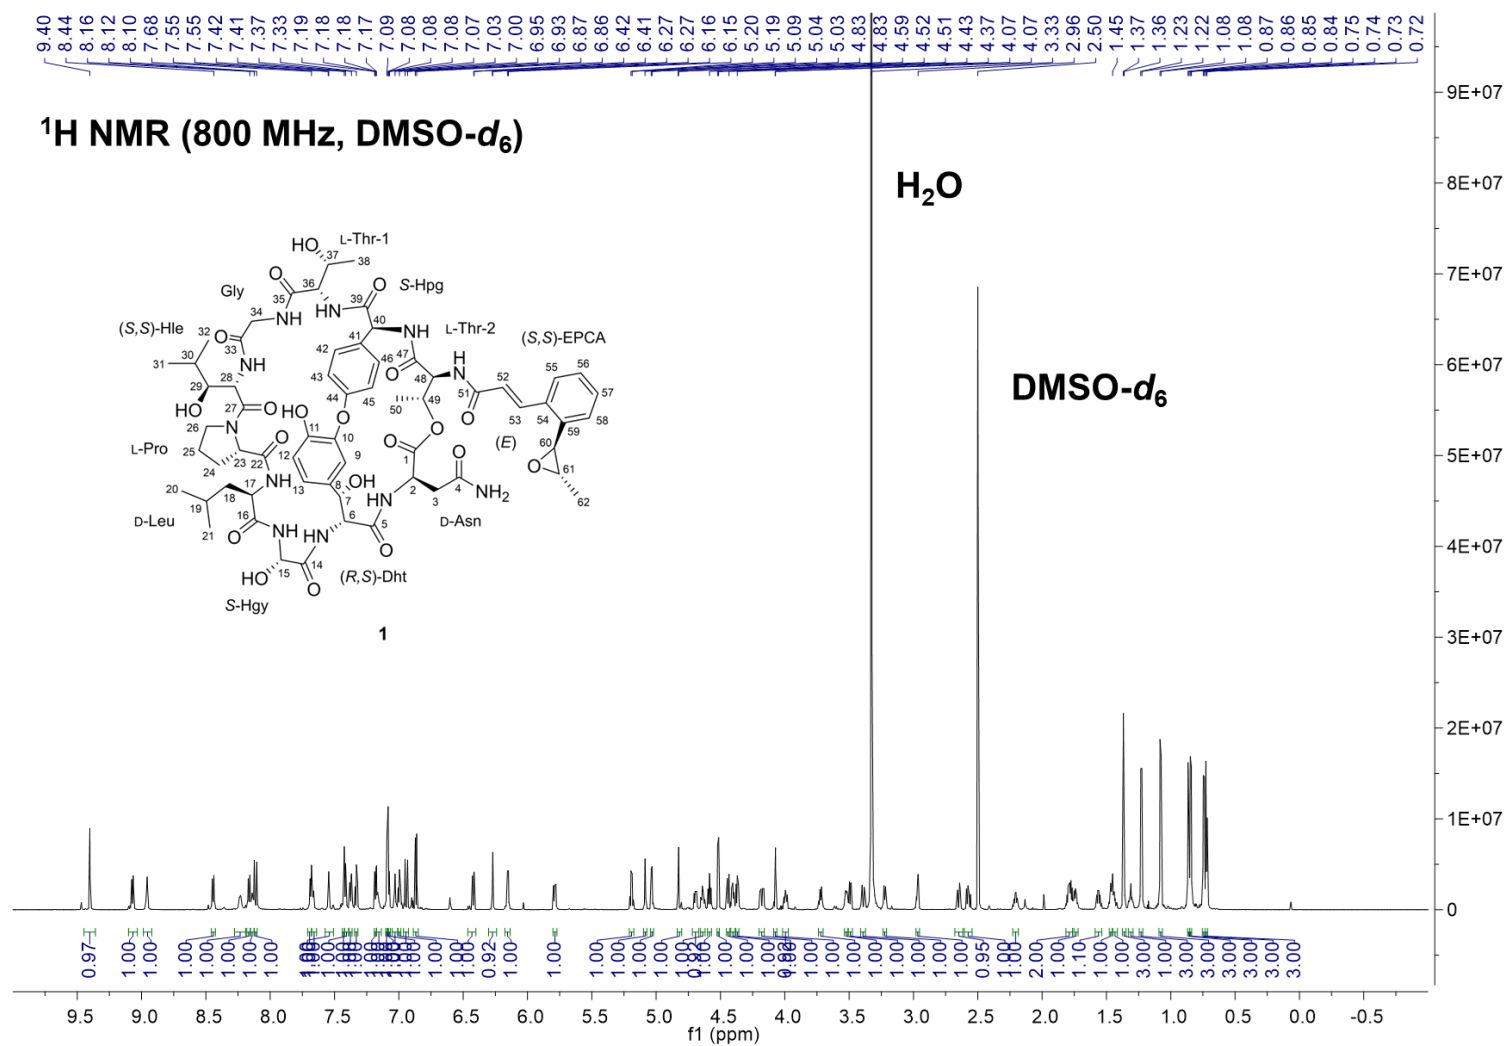

**Figure S5.**  $^{13}\text{C}$  NMR (200 MHz,  $\text{DMSO}-d_6$ ) spectrum of the epoxinnamide (**1**).

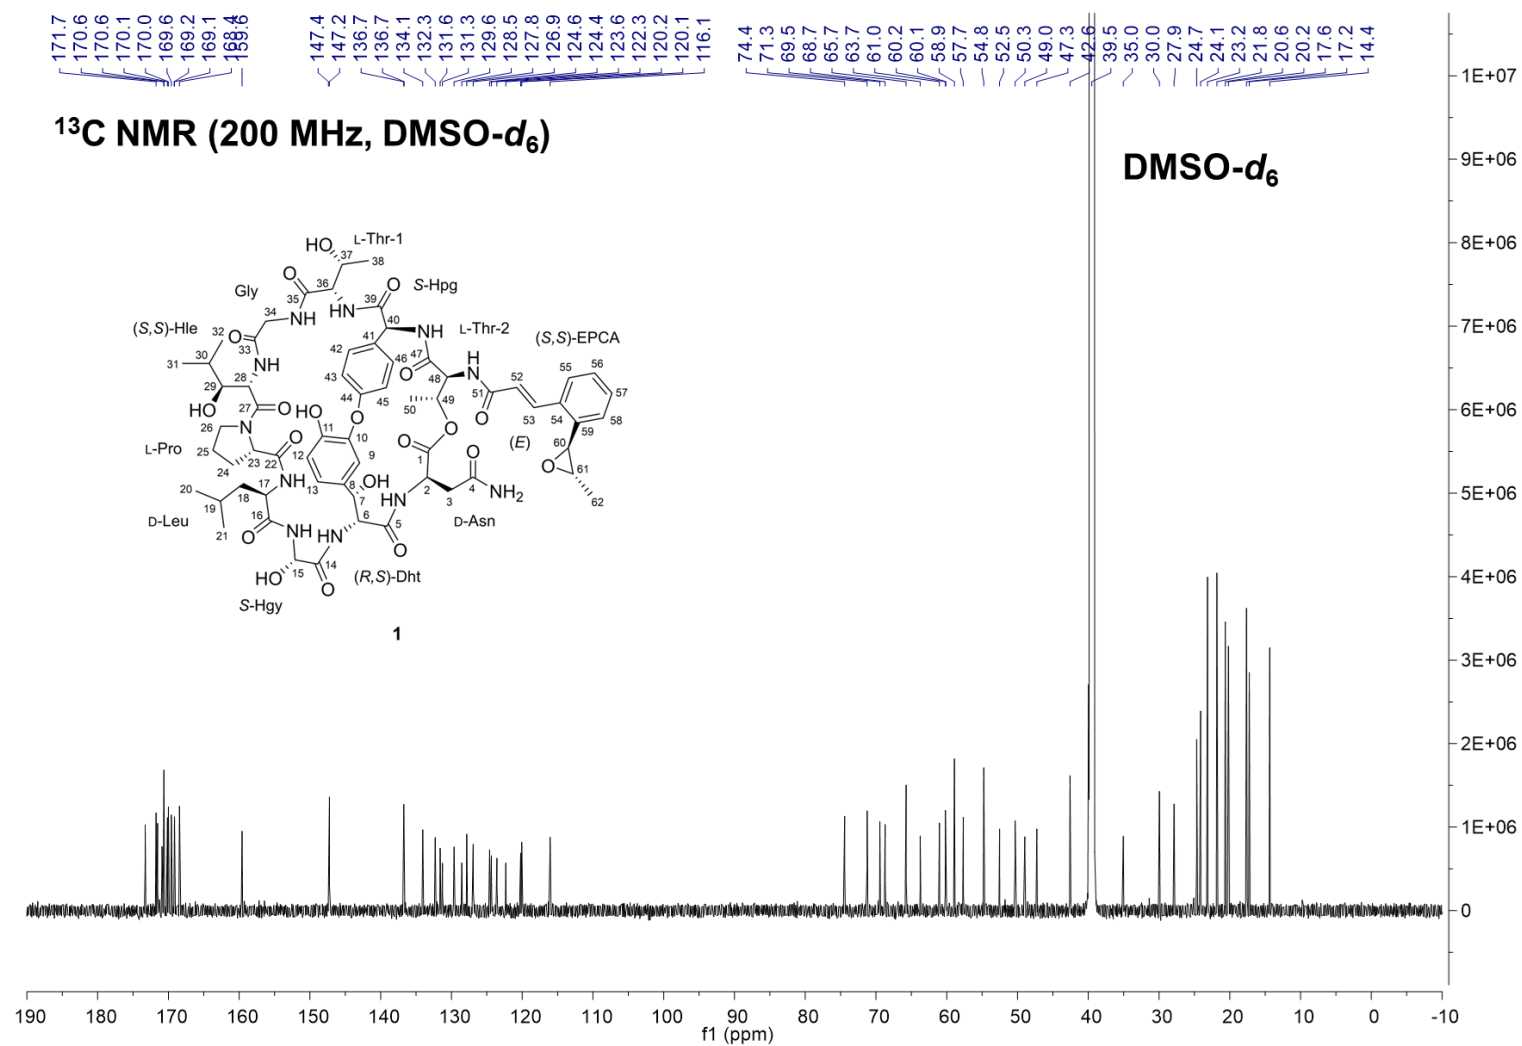



**Figure S6.** HSQC NMR (800 MHz, DMSO-*d*<sub>6</sub>) spectrum of the epoxinamide (1).

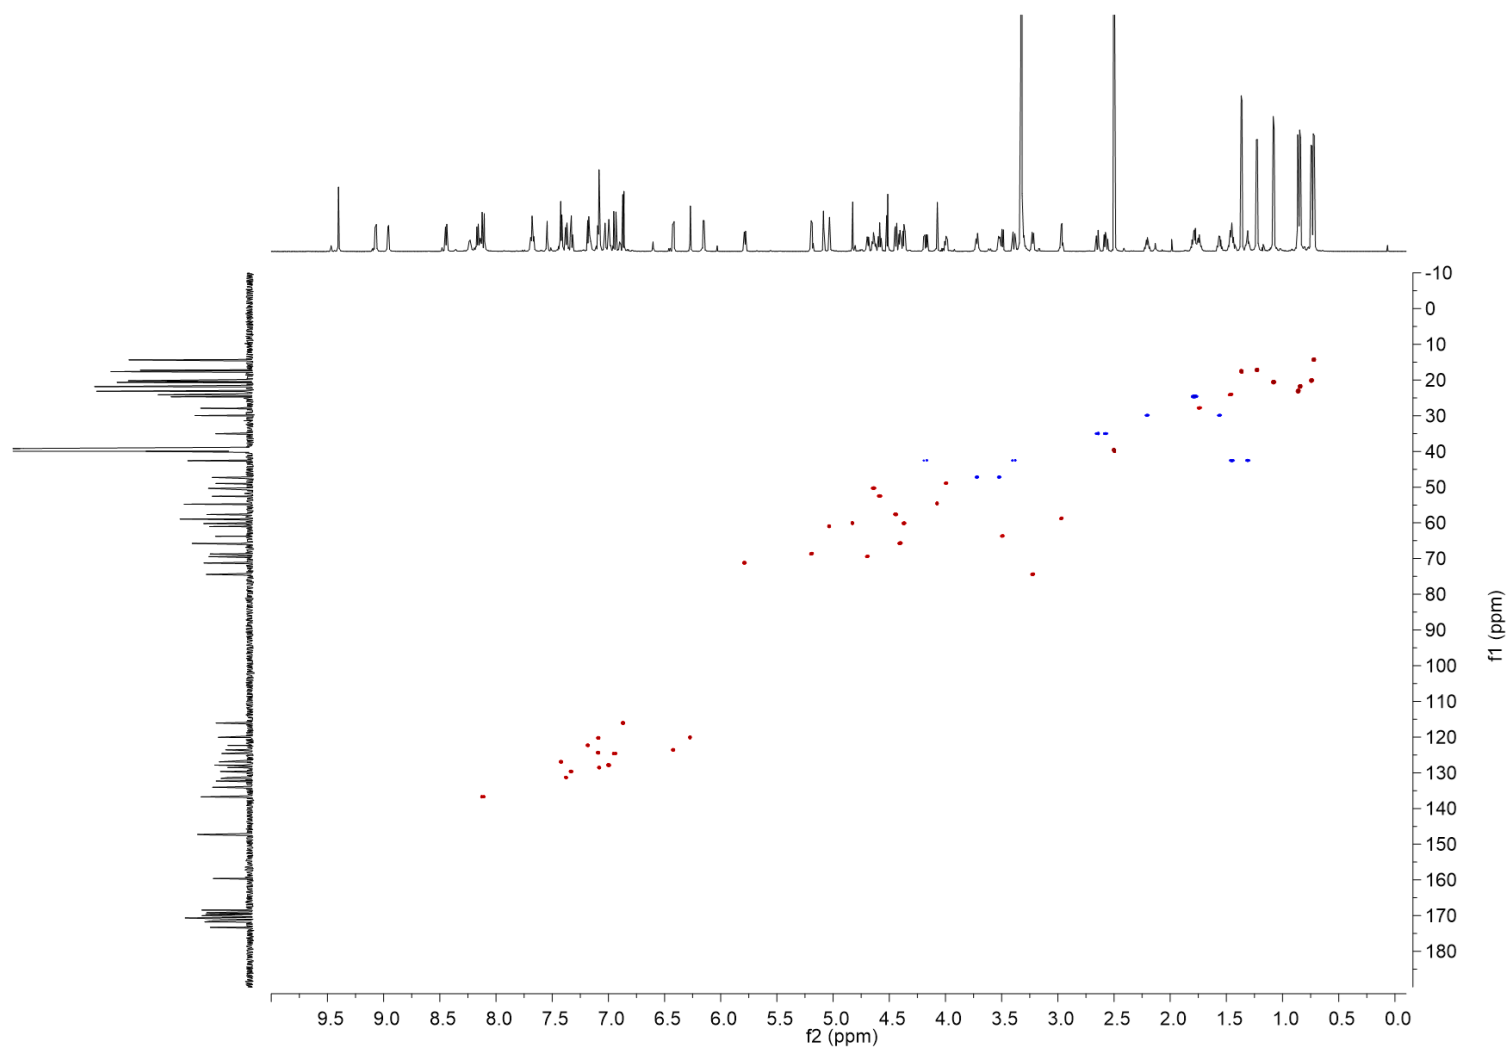

**Figure S7.** Structure comparison between epoxinnamide (1) and nyuzenamide C [21].

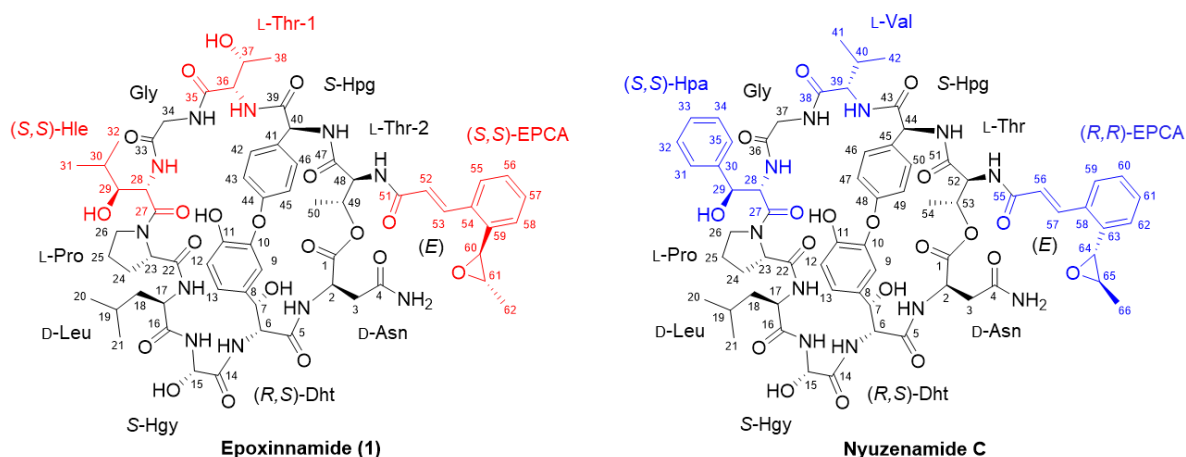

**Table S1.**  $^1\text{H}$  (800 MHz,  $\text{DMSO-}d_6$ ) and  $^{13}\text{C}$  NMR (200 MHz,  $\text{DMSO-}d_6$ ) comparison table between epoxinnamide (1) and nyuzenamide C [21].

| Epoxinnamide (1)   |                       |                       | Nyuzenamide C      |                       |                       | $\Delta\delta_{\text{C}}$<br>(= $\delta_{\text{C,E}} - \delta_{\text{C,N}}$ ) | $\Delta\delta_{\text{H}}$<br>(= $\delta_{\text{H,E}} - \delta_{\text{H,N}}$ ) |
|--------------------|-----------------------|-----------------------|--------------------|-----------------------|-----------------------|-------------------------------------------------------------------------------|-------------------------------------------------------------------------------|
| position           | $\delta_{\text{C,E}}$ | $\delta_{\text{H,E}}$ | position           | $\delta_{\text{C,N}}$ | $\delta_{\text{H,N}}$ |                                                                               |                                                                               |
| D-Asn              |                       |                       | D-Asn              |                       |                       |                                                                               |                                                                               |
| 1                  | 169.6                 |                       | 1                  | 169.6                 |                       | 0                                                                             |                                                                               |
| 2                  | 49.0                  | 3.99                  | 2                  | 49.1                  | 3.95                  | -0.1                                                                          | 0.04                                                                          |
| 2-NH               |                       | 8.23                  | 2-NH               |                       | 8.27                  |                                                                               | -0.04                                                                         |
| 3a                 | 35.1                  | 2.65                  | 3a                 | 34.9                  | 2.70                  | 0.2                                                                           | -0.05                                                                         |
| 3b                 |                       | 2.57                  | 3b                 |                       | 2.61                  |                                                                               | -0.04                                                                         |
| 4                  | 170.64                |                       | 4                  | 170.7                 |                       | -0.1                                                                          |                                                                               |
| 4-NH <sub>2a</sub> |                       | 7.43                  | 4-NH <sub>2a</sub> |                       | 7.47                  |                                                                               | -0.04                                                                         |
| 4-NH <sub>2b</sub> |                       | 7.03                  | 4-NH <sub>2b</sub> |                       | 7.06                  |                                                                               | -0.03                                                                         |
| (R,S)-Dht          |                       |                       | (R,S)-Dht          |                       |                       |                                                                               |                                                                               |
| 5                  | 170.63                |                       | 5                  | 170.7                 |                       | -0.1                                                                          |                                                                               |
| 6                  | 63.8                  | 3.49                  | 6                  | 64.2                  | 3.54                  | -0.4                                                                          | -0.05                                                                         |
| 6-NH               |                       | 8.14                  | 6-NH               |                       | 8.16                  |                                                                               | -0.02                                                                         |
| 7                  | 69.5                  | 4.69                  | 7                  | 69.6                  | 4.72                  | -0.1                                                                          | -0.03                                                                         |
| 7-OH               |                       | 6.15                  | 7-OH               |                       | 6.24                  |                                                                               | -0.09                                                                         |
| 8                  | 132.3                 |                       | 8                  | 132.7                 |                       | -0.4                                                                          |                                                                               |
| 9                  | 120.1                 | 6.27                  | 9                  | 120.8                 | 6.34                  | -0.7                                                                          | -0.07                                                                         |
| 10                 | 147.3                 |                       | 10                 | 147.2                 |                       | 0.1                                                                           |                                                                               |
| 11                 | 147.4                 |                       | 11                 | 147.7                 |                       | -0.3                                                                          |                                                                               |
| 11-OH              |                       | 9.40                  | 11-OH              |                       | 9.46                  |                                                                               | -0.06                                                                         |
| 12                 | 116.1                 | 6.87                  | 12                 | 116.2                 | 6.97                  | -0.1                                                                          | -0.10                                                                         |
| 13                 | 120.2                 | 7.08                  | 13                 | 120.1                 | 7.21                  | 0.1                                                                           | -0.13                                                                         |
| S-Hgy              |                       |                       | S-Hgy              |                       |                       |                                                                               |                                                                               |
| 14                 | 170.9                 |                       | 14                 | 171.0                 |                       | -0.1                                                                          |                                                                               |
| 15                 | 71.3                  | 5.79                  | 15                 | 71.1                  | 5.77                  | 0.2                                                                           | 0.02                                                                          |

|           |       |      |           |       |      |      |       |
|-----------|-------|------|-----------|-------|------|------|-------|
| 15-OH     |       | 7.17 | 15-OH     |       | 7.13 |      | 0.04  |
| 15-NH     |       | 9.07 | 15-NH     |       | 9.04 |      | 0.03  |
| D-Leu     |       |      | D-Leu     |       |      |      |       |
| 16        | 171.5 |      | 16        | 171.4 |      | 0.1  |       |
| 17        | 50.3  | 4.64 | 17        | 50.3  | 4.58 | 0    | 0.06  |
| 17-NH     |       | 8.44 | 17-NH     |       | 8.53 |      | -0.09 |
| 18a       | 42.58 | 1.45 | 18a       | 42.3  | 1.44 | 0.3  | 0.01  |
| 18b       |       | 1.31 | 18b       |       | 1.28 |      | 0.03  |
| 19        | 24.1  | 1.46 | 19        | 24.1  | 1.45 | 0    | 0.01  |
| 20        | 23.2  | 0.86 | 20        | 23.1  | 0.85 | 0.1  | 0.01  |
| 21        | 21.8  | 0.85 | 21        | 21.8  | 0.81 | 0    | 0.04  |
| L-Pro     |       |      | L-Pro     |       |      |      |       |
| 22        | 171.8 |      | 22        | 171.5 |      | 0.3  |       |
| 23        | 60.2  | 4.37 | 23        | 60.4  | 4.40 | -0.2 | -0.03 |
| 24a       | 30.0  | 2.21 | 24a       | 29.8  | 2.26 | 0.2  | -0.05 |
| 24b       |       | 1.56 | 24b       |       | 1.63 |      | -0.07 |
| 25a       | 24.7  | 1.79 | 25a       | 24.8  | 1.89 | -0.1 | -0.10 |
| 25b       |       | 1.79 | 25b       |       | 1.82 |      | -0.03 |
| 26a       | 47.3  | 3.72 | 26a       | 47.5  | 3.92 | -0.2 | -0.20 |
| 26b       |       | 3.52 | 26b       |       | 3.66 |      | -0.14 |
| (S,S)-Hle |       |      | (S,S)-Hpa |       |      |      |       |
| 27        | 170.1 |      | 27        | 169.1 |      |      |       |
| 28        | 52.5  | 4.59 | 28        | 57.5  | 4.53 |      |       |
| 28-NH     |       | 7.69 | 28-NH     |       | 7.90 |      |       |
| 29        | 74.4  | 3.22 | 29        | 73.3  | 4.32 |      |       |
| 29-OH     |       | 5.09 | 29-OH     |       | 5.75 |      |       |
| 30        | 27.9  | 1.74 | 30        | 141.7 |      |      |       |
| 31        | 14.4  | 0.72 | 31        | 126.4 | 7.48 |      |       |
| 32        | 20.2  | 0.74 | 32        | 127.8 | 7.27 |      |       |
|           |       |      | 33        | 127.5 | 7.27 |      |       |
|           |       |      | 34        | 127.8 | 7.27 |      |       |
|           |       |      | 35        | 126.4 | 7.48 |      |       |
| Gly       |       |      | Gly       |       |      |      |       |
| 33        | 168.4 |      | 36        | 168.7 |      | -0.3 |       |
| 34a       | 42.60 | 4.18 | 37a       | 42.8  | 3.98 | -0.2 | 0.20  |
| 34b       |       | 3.39 | 37b       |       | 3.30 |      | 0.09  |
| 34-NH     |       | 7.68 | 37-NH     |       | 7.50 |      | 0.18  |
| L-Thr-1   |       |      | L-Val     |       |      |      |       |
| 35        | 170.0 |      | 38        | 170.4 |      |      |       |
| 36        | 57.7  | 4.44 | 39        | 56.7  | 4.56 |      |       |
| 36-NH     |       | 8.16 | 39-NH     |       | 7.84 |      |       |
| 37        | 65.8  | 4.40 | 40        | 28.9  | 2.65 |      |       |
| 37-OH     |       | 4.52 | 41        | 17.2  | 1.16 |      |       |
| 38        | 20.3  | 1.08 | 42        | 19.8  | 0.80 |      |       |

| S-Hpg      |       |      | S-Hpg           |                    |                   |      |       |
|------------|-------|------|-----------------|--------------------|-------------------|------|-------|
| 39         | 169.1 |      | 43              | 169.2              |                   | -0.1 |       |
| 40         | 60.1  | 4.83 | 44              | 60.3               | 4.77              | -0.2 | 0.06  |
| 40-NH      |       | 7.55 | 44-NH           |                    | 7.67              |      | -0.12 |
| 41         | 131.6 |      | 45              | 131.5              |                   | 0.1  |       |
| 42         | 128.5 | 7.07 | 46              | 127.9              | 7.05              | 0.6  | 0.02  |
| 43         | 123.6 | 6.42 | 47              | 123.5              | 6.51              | 0.1  | -0.09 |
| 44         | 159.6 |      | 48              | 160.0              |                   | -0.4 |       |
| 45         | 122.3 | 7.18 | 49              | 122.3              | 7.25              | 0    | -0.07 |
| 46         | 131.3 | 7.37 | 50              | 131.1              | 7.44              | 0.2  | -0.07 |
| L-Thr-2    |       |      | L-Thr           |                    |                   |      |       |
| 47         | 173.3 |      | 51              | 173.0              |                   | 0.3  |       |
| 48         | 61.0  | 5.03 | 52              | 60.7               | 4.96              | 0.3  | 0.07  |
| 48-NH      |       | 8.96 | 52-NH           |                    | 9.00              |      | -0.04 |
| 49         | 68.7  | 5.19 | 53              | 69.0               | 5.22              | -0.3 | -0.03 |
| 50         | 17.3  | 1.23 | 54              | 17.5               | 1.27              | -0.2 | -0.04 |
| (S,S)-EPCA |       |      | (R,R)-EPCA      |                    |                   |      |       |
| 51         | 169.2 |      | 55              | 168.4              |                   | 0.8  |       |
| 52         | 124.6 | 6.94 | 56 <sup>a</sup> | 127.2 <sup>a</sup> | 6.98 <sup>a</sup> | -2.6 | -0.04 |
| 53         | 136.7 | 8.11 | 57 <sup>a</sup> | 135.8 <sup>a</sup> | 7.91 <sup>a</sup> | 0.9  | 0.20  |
| 54         | 134.1 |      | 58              | 134.9              |                   | -0.8 |       |
| 55         | 126.9 | 7.42 | 59              | 126.9              | 7.04              | 0    | 0.38  |
| 56         | 127.8 | 7.00 | 60              | 128.3              | 7.09              | -0.5 | -0.09 |
| 57         | 129.6 | 7.33 | 61              | 129.7              | 7.36              | -0.1 | -0.03 |
| 58         | 124.4 | 7.09 | 62              | 124.7              | 7.07              | -0.3 | 0.02  |
| 59         | 136.7 |      | 63              | 135.9              |                   | 0.8  |       |
| 60         | 54.8  | 4.07 | 64              | 54.8               | 3.31              | 0    | 0.76  |
| 61         | 58.9  | 2.97 | 65              | 57.8               | 2.74              | 1.1  | 0.23  |
| 62         | 17.6  | 1.37 | 66              | 16.3               | 0.54              | 1.3  | 0.83  |

<sup>a</sup> Previously-reported data [21] would have to be exchanged.

**Figure S8.** COSY NMR (800 MHz, DMSO- $d_6$ ) spectrum of the epoxinamide (**1**).

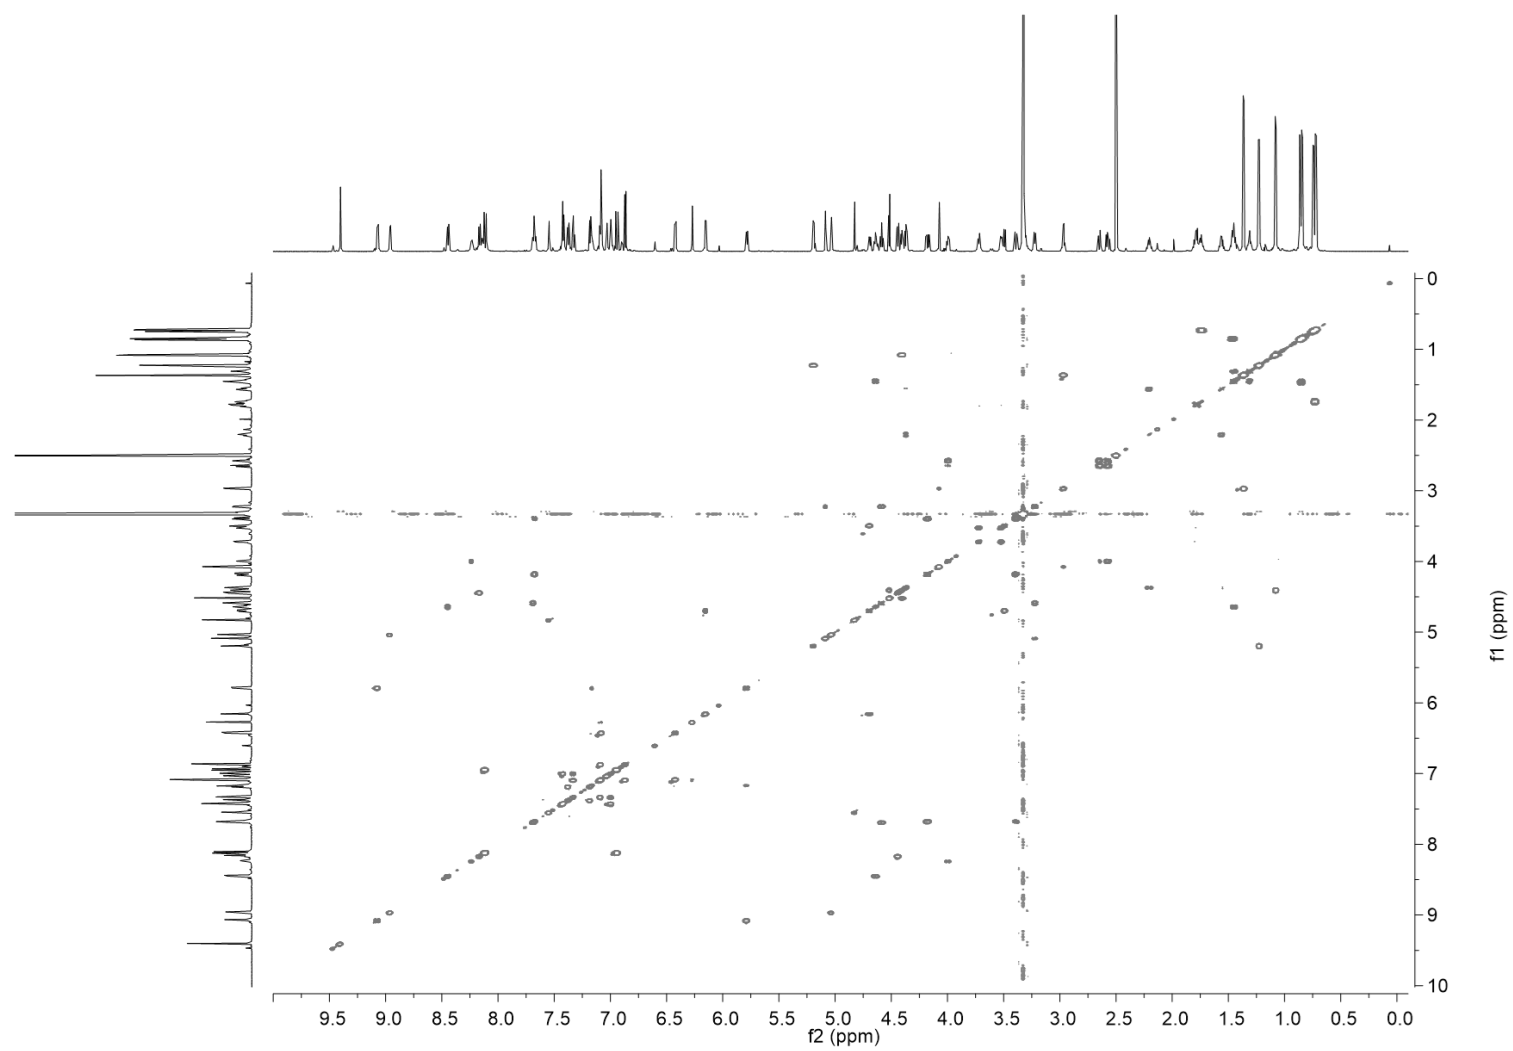

**Figure S9.** TOCSY NMR (800 MHz, DMSO-*d*<sub>6</sub>) spectrum of the epoxinnamide (**1**).

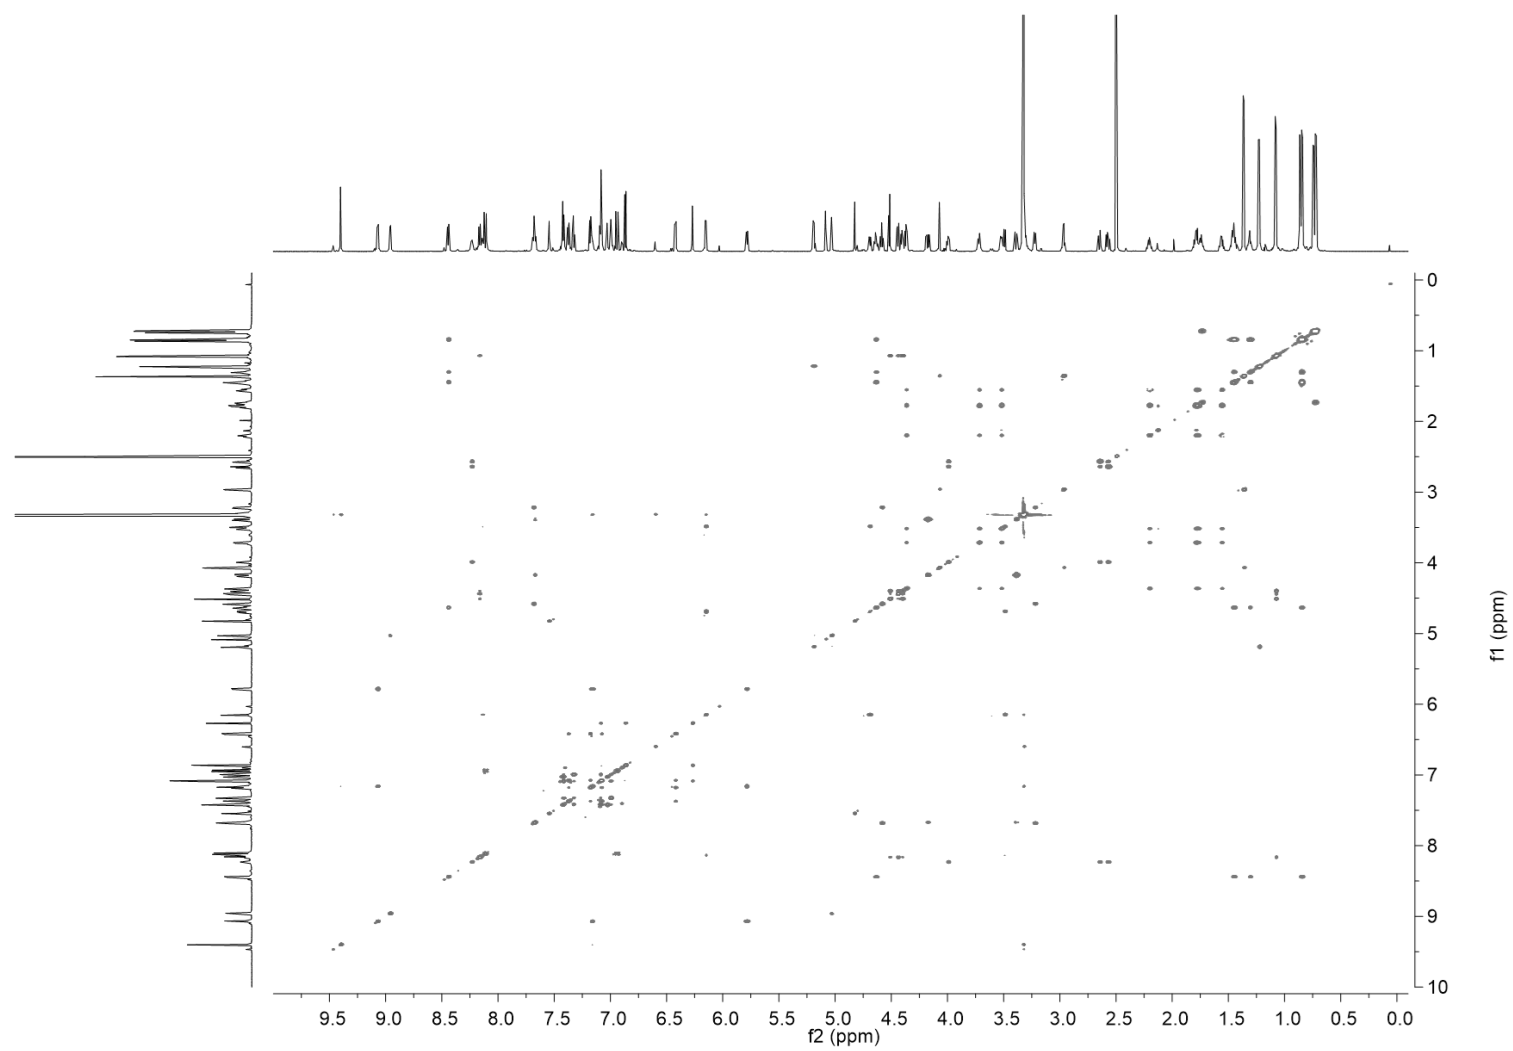

**Figure S10.** HMBC NMR (800 MHz, DMSO-*d*<sub>6</sub>) spectrum of the epoxinamide (1).

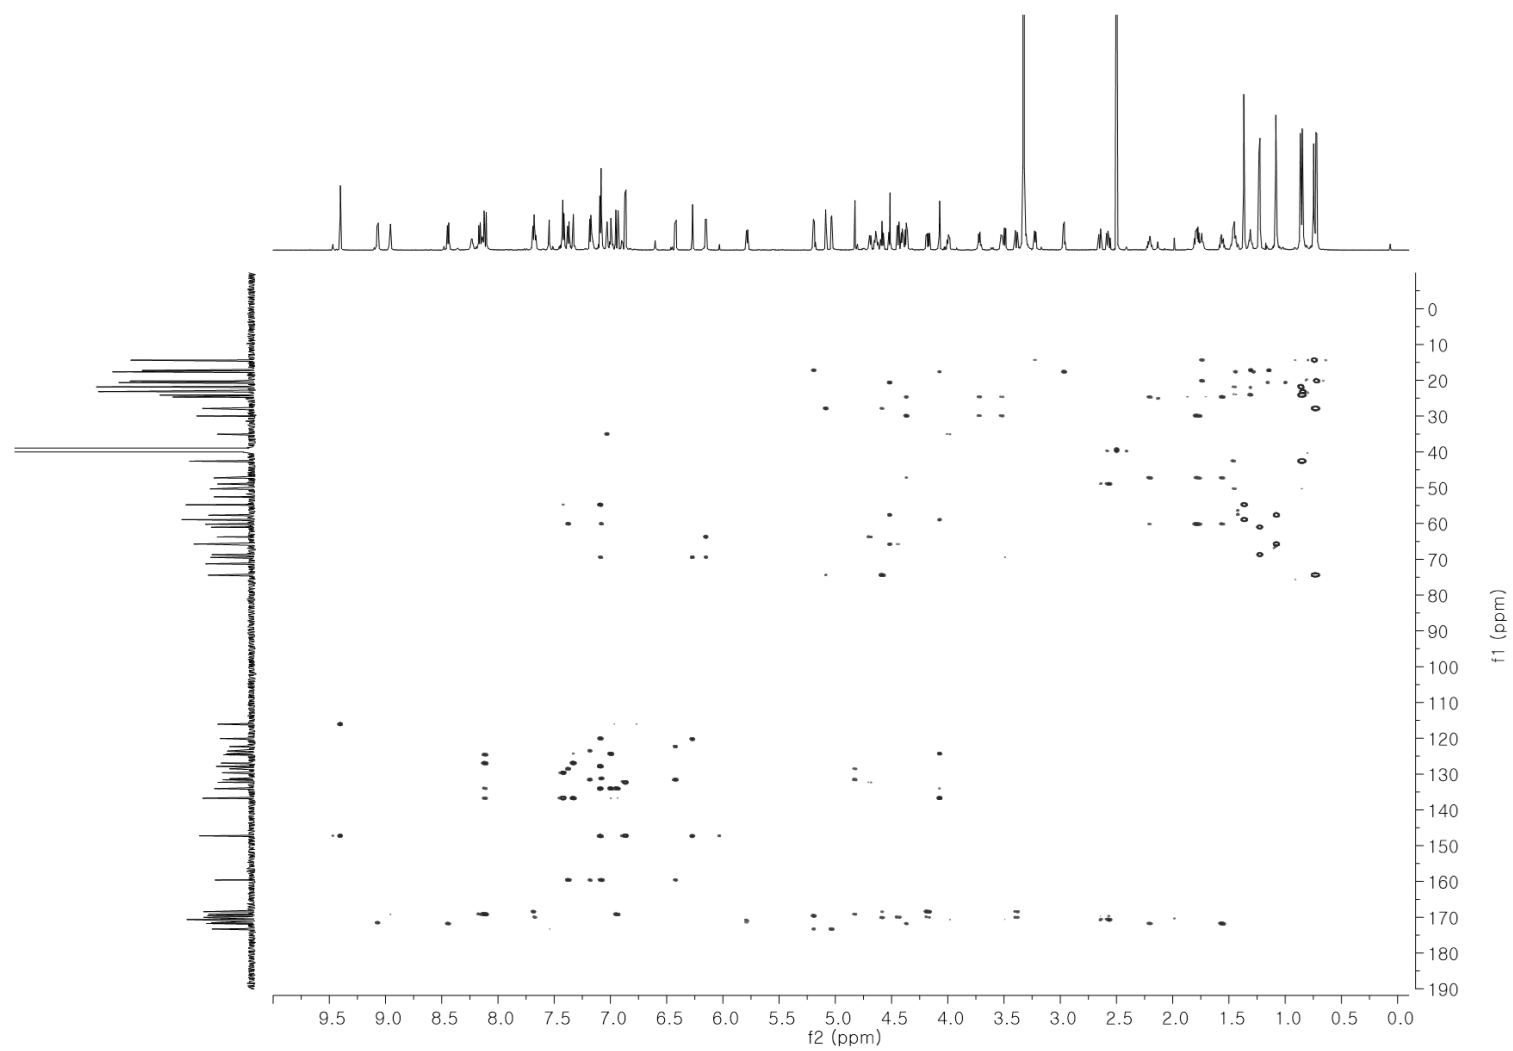

**Figure S11.** ROESY NMR (800 MHz, DMSO-*d*<sub>6</sub>) spectrum of the epoxinamide (**1**).

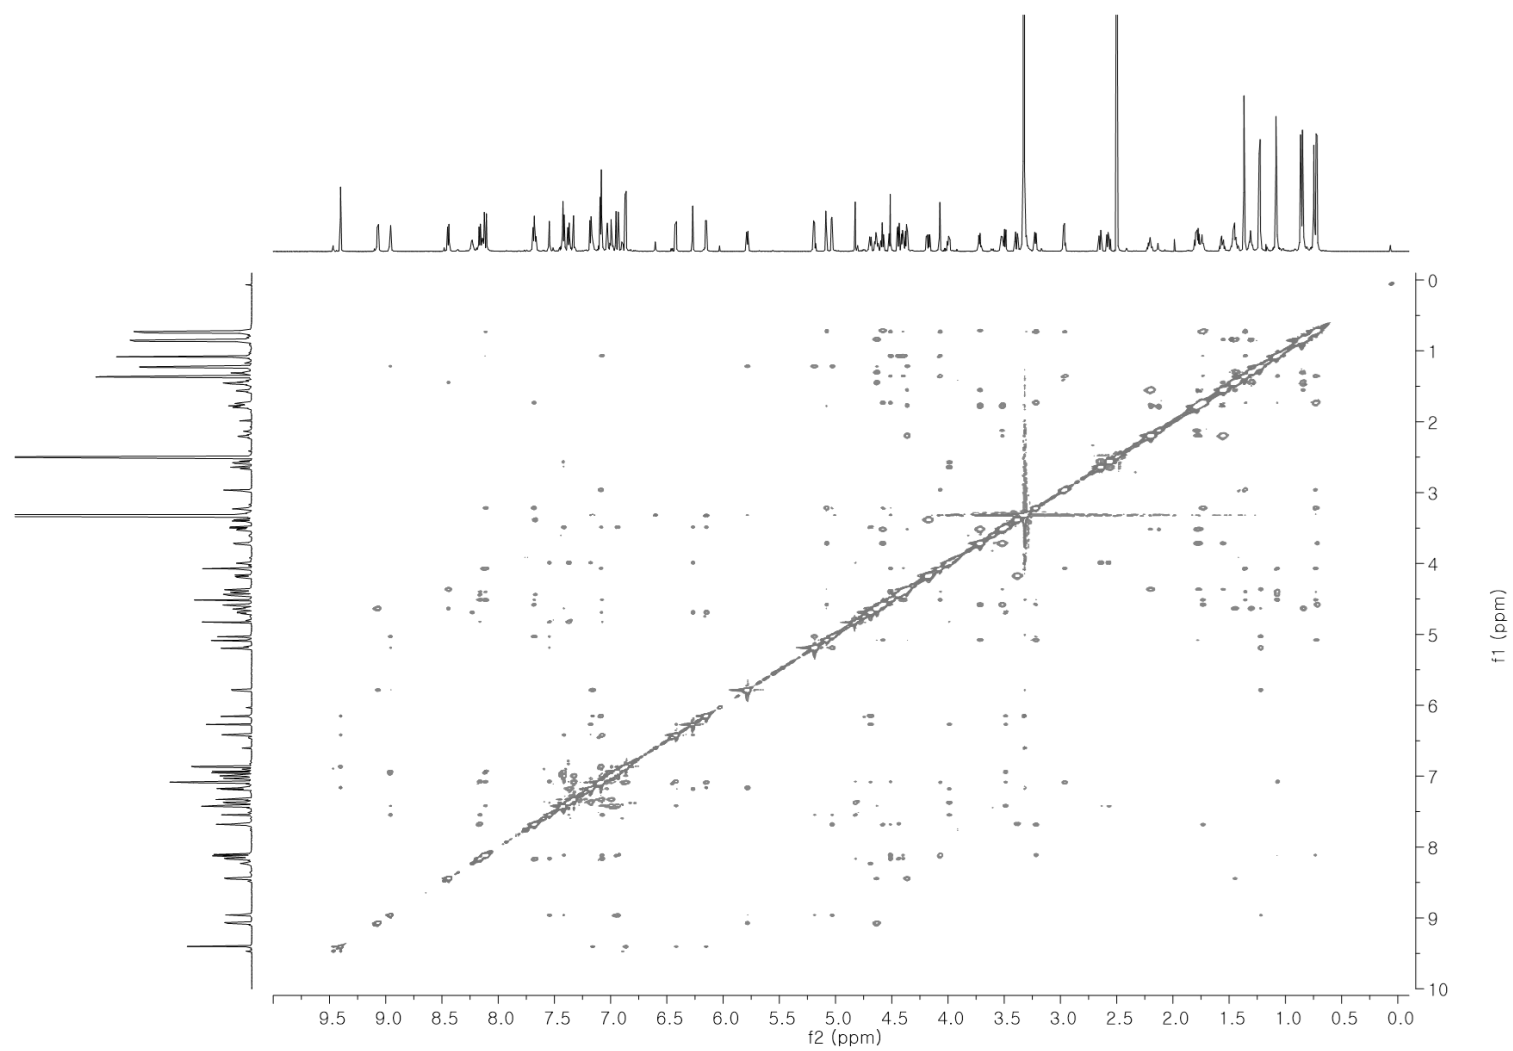



**Figure S12.** 16S rRNA gene sequence-based neighbor-joining tree showing the phylogenetic position of the strain OID44 (marked in red and bold). Nyuzenamamide-producing strains N11-34 and DM14 are marked in bold. The evolutionary distances were computed using the maximum composite likelihood method with the rate variation among sites modeled with a gamma distribution. Bootstrap supporting values ( $\geq 50\%$ ; 100 replicates) are shown on the branches. The scale bar indicates the average number of base substitutions per site.

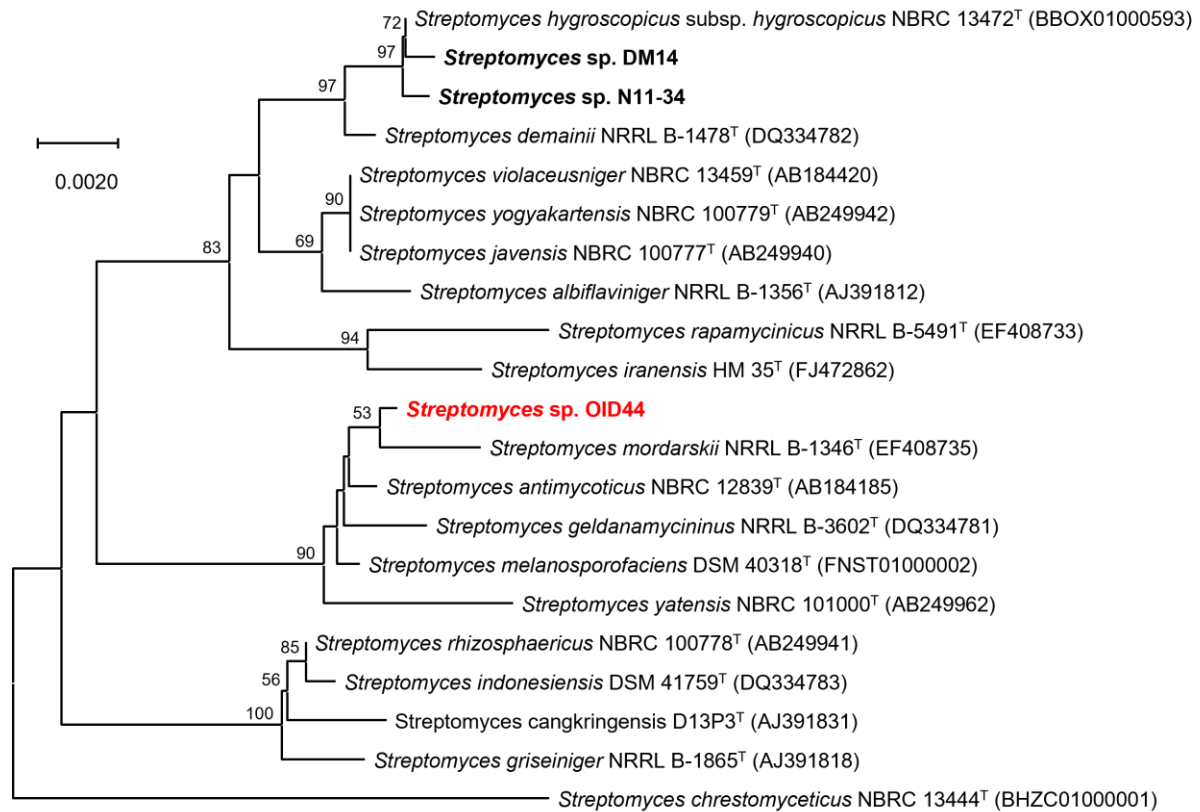

**Figure S13.** LC/MS chromatograms of L- and D-FDAA derivatives of amino acids in the epoxinnamide (1). (a) asparagine (aspartic acid), (b) leucine, (c) proline, (d)  $\beta$ -hydroxyisoleucine, (e) threonine

**(a) Asn (Asp):  $[M-H]^-$  m/z at 384**

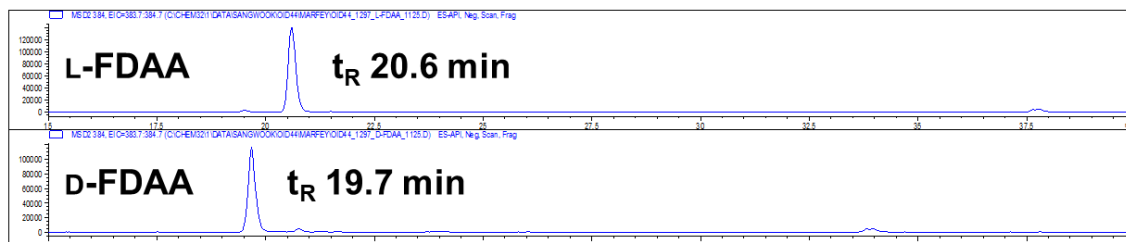

**(b) Leu:  $[M-H]^-$  m/z at 382**

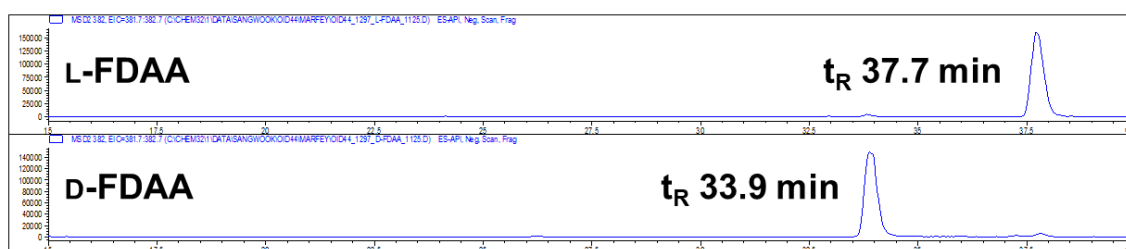

**(c) Pro:  $[M-H]^-$  m/z at 366**

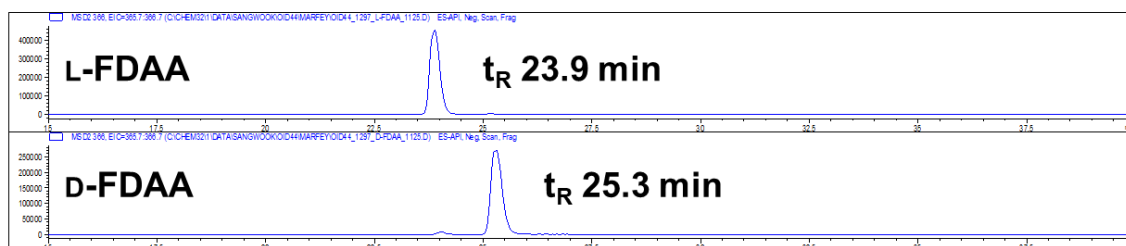

**(d) Hle:  $[M-H]^-$  m/z at 398**

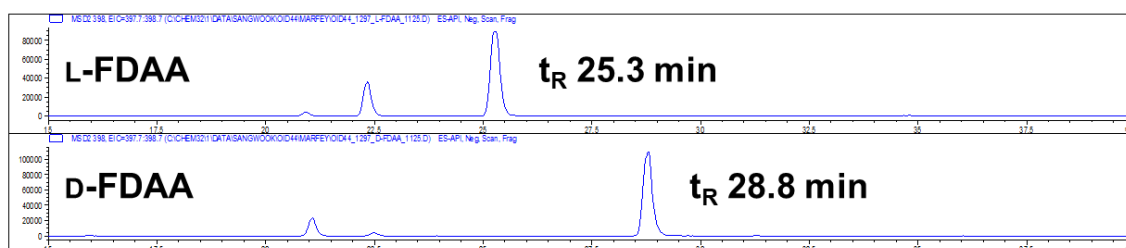

**(e) Thr:  $[M-H]^-$  m/z at 370**

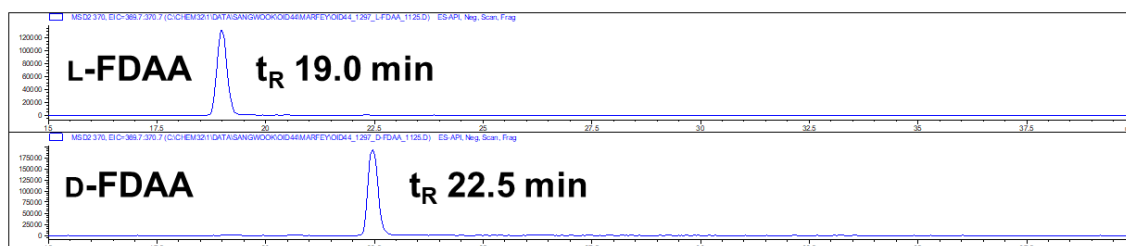

**Table S2.** LC/MS analysis of L- and D-FDAA derivatives of amino acids in the epoxinnamide (1).

| Amino Acids | $t_{RL}$ (min) | $t_{RD}$ (min) | Elution Order     | $\Delta t$ ( $=t_{RD}-t_{RL}$ , min) |
|-------------|----------------|----------------|-------------------|--------------------------------------|
| Asn (Asp)   | 20.6           | 19.7           | D $\rightarrow$ L | -0.9                                 |
| Leu         | 37.7           | 33.9           | D $\rightarrow$ L | -3.8                                 |
| Pro         | 23.9           | 25.3           | L $\rightarrow$ D | 1.4                                  |
| Hle         | 25.3           | 28.8           | L $\rightarrow$ D | 3.5                                  |
| Thr         | 19.0           | 22.5           | L $\rightarrow$ D | 3.5                                  |

**Figure S14.** LC/MS chromatograms of D-FDAA derivatives of threonine in the epoxinnamide (1) and authentic threonines. (a) D-FDAA derivative of threonine in the epoxinnamide, (b) D-FDAA derivative of authentic L-Threonine, (c) D-FDAA derivative of authentic L-*allo*-Threonine

**(a) D-FDAA derivative of threonine in the epoxinnamide (1)**

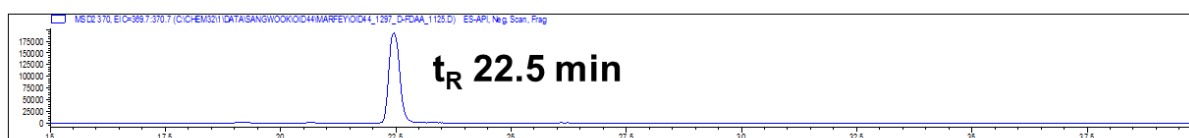

**(b) D-FDAA derivative of authentic L-Thr**

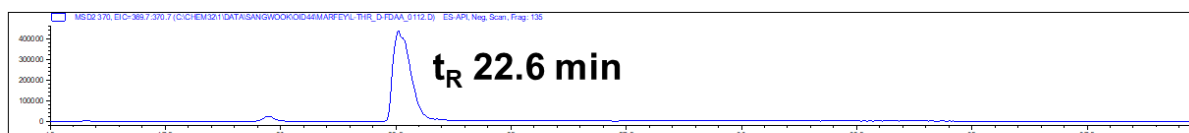

**(c) D-FDAA derivative of authentic L-*allo*-Thr**

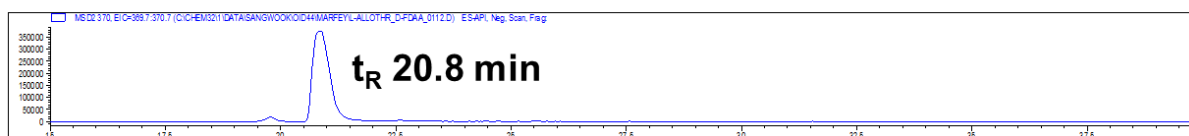

**Figure S15.**  $^1\text{H}$ ,  $^{13}\text{C}$ , and  $^3J_{\text{H2-H3}}$  values of hydroxyleucine moiety in various natural products. (a) (2*S*,3*S*)-hydroxyleucine, (b) (2*R*,3*R*)-hydroxyleucine, (c) (2*S*,3*R*)-hydroxyleucine, (d) (2*R*,3*S*)-hydroxyleucine [22-32].

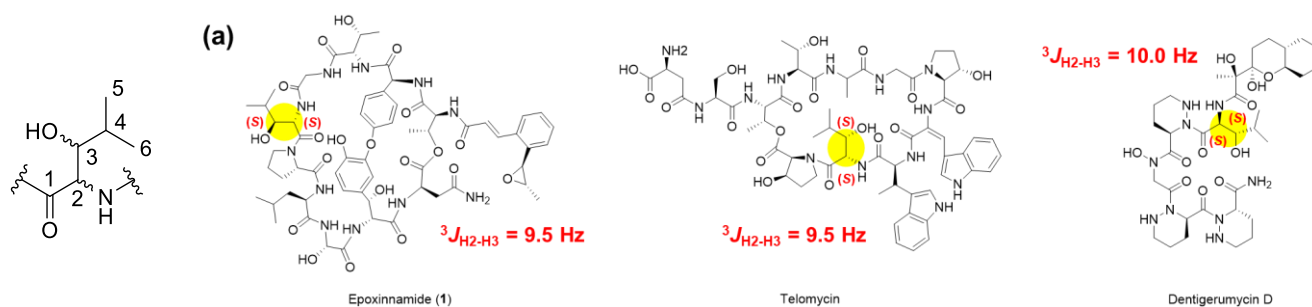

| Compounds | Epoxinnamide (1) <sup>a</sup> |                               | Telomycin <sup>b</sup> |                               | Dentigerumycin D <sup>c</sup> |                               |
|-----------|-------------------------------|-------------------------------|------------------------|-------------------------------|-------------------------------|-------------------------------|
| Position  | $\delta_{\text{C}}$           | $\delta_{\text{H}}$ (J in Hz) | $\delta_{\text{C}}$    | $\delta_{\text{H}}$ (J in Hz) | $\delta_{\text{C}}$           | $\delta_{\text{H}}$ (J in Hz) |
| 1         | 170.1                         |                               |                        |                               | 172.4                         |                               |
| 2         | 52.5                          | 4.59, dd (9.5, 9.5)           | 51.6                   | 4.54, (9.5)                   | 49.6                          | 5.48, dd (10.0, 1.0)          |
| 2-NH      |                               | 7.69, d (9.5)                 |                        |                               |                               | 7.66, d (10.0)                |
| 3         | 74.4                          | 3.22, ddd (9.5, 2.0, 2.0)     | 75.2                   | 3.29                          | 75.6                          | 3.39, dd (10.0, 3.0)          |
| 3-OH      |                               | 5.09, br d(2.0)               |                        |                               |                               |                               |
| 4         | 27.9                          | 1.74, m                       | 28.8                   | 1.94                          | 28.2                          | 1.75, m                       |
| 5         | 14.4                          | 0.72, d (7.0)                 | 19.6                   | 0.87                          | 20.0                          | 0.83, d (6.5)                 |
| 6         | 20.2                          | 0.74, d (7.0)                 | 17.2                   | 0.84                          | 15.0                          | 0.83, d (6.5)                 |

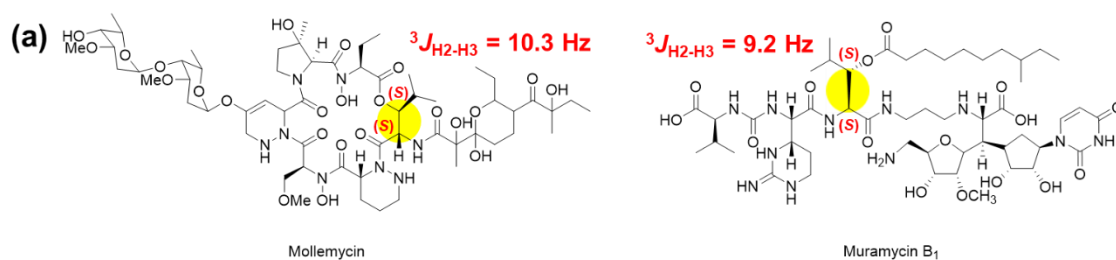

| Compounds | Mollemycin <sup>d</sup> |                               | Muramycin B <sub>1</sub> <sup>e</sup> |                               |
|-----------|-------------------------|-------------------------------|---------------------------------------|-------------------------------|
| Position  | $\delta_{\text{C}}$     | $\delta_{\text{H}}$ (J in Hz) | $\delta_{\text{C}}$                   | $\delta_{\text{H}}$ (J in Hz) |
| 1         | 171.1                   |                               | 169.2                                 |                               |
| 2         | 56.1                    | 4.90, dd (10.4, 10.3)         | 53.1                                  | 4.45, dd (9.2, 8.7)           |
| 2-NH      |                         | 8.23, d (10.4)                |                                       | 8.45, d (8.7)                 |
| 3         | 76.8                    | 5.38, dd (10.3, 1.9)          | 75.0                                  | 4.93, dd (9.2, 3.3)           |
| 3-OH      |                         | -                             |                                       | -                             |
| 4         | 29.5                    | 1.87, m                       | 27.8                                  | 1.91, m                       |
| 5         | 21.0                    | 0.94, d (6.9)                 | 19.6                                  | 0.82                          |
| 6         | 15.0                    | 0.86, d (6.9)                 | 15.7                                  | 0.80                          |

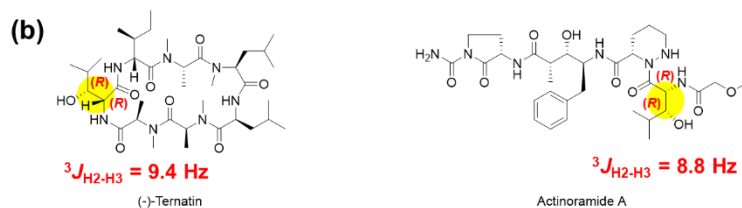

| Compounds |            | (-)-Ternatin <sup>f</sup> |  | Actinoramide A <sup>g</sup> |                      |
|-----------|------------|---------------------------|--|-----------------------------|----------------------|
| Position  | $\delta_C$ | $\delta_H$ (J in Hz)      |  | $\delta_C$                  | $\delta_H$ (J in Hz) |
| 1         | 174.8      |                           |  | 173.0                       |                      |
| 2         | 56.3       | 5.17, dd (9.4, 8.0)       |  | 50.4                        | 5.50, dd (8.8, 8.8)  |
| 2-NH      |            | 7.92, d (8.0)             |  |                             | 7.43, d (8.8)        |
| 3         | 76.0       | 3.96, dd (9.4, 2.1)       |  | 75.7                        | 3.43*                |
| 3-OH      |            | 5.87, s                   |  |                             | 4.79, d (7.1)        |
| 4         | 29.5       | 2.21-2.25, m              |  | 29.8                        | 1.64, m              |
| 5         | 21.0       | 1.44, d (6.8)             |  | 20.8                        | 0.87, d (7.1)        |
| 6         | 15.0       | 1.52, d (6.8)             |  | 16.1                        | 0.83, d (7.1)        |

<sup>a</sup> NMR data were acquired in 800 MHz, DMSO-*d*<sub>6</sub>

<sup>b</sup> NMR data were acquired in 500 MHz, DMSO-*d*<sub>6</sub>

<sup>c</sup> NMR data were acquired in 600 MHz, DMSO-*d*<sub>6</sub>

<sup>d</sup> NMR data were acquired in 900 MHz, CDCl<sub>3</sub>

<sup>e</sup> NMR data were acquired in 500 MHz, DMSO-*d*<sub>6</sub>

<sup>f</sup> NMR data were acquired in 800 MHz, C<sub>6</sub>D<sub>6</sub>

<sup>g</sup> NMR data were acquired in 500 MHz for <sup>1</sup>H and 75 MHz for <sup>13</sup>C, DMSO-*d*<sub>6</sub>

\* Overlapped

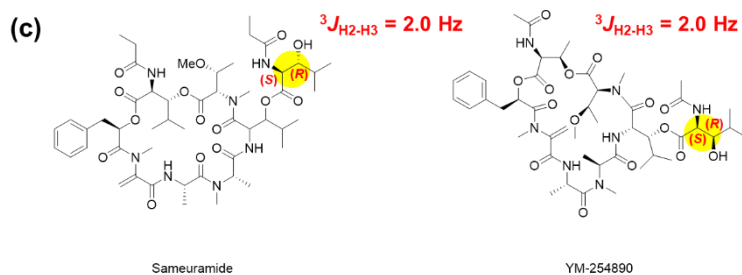

| Compounds |            | Sameuramide <sup>h</sup> |  | YM-254890 <sup>i</sup> |                      |
|-----------|------------|--------------------------|--|------------------------|----------------------|
| Position  | $\delta_C$ | $\delta_H$ (J in Hz)     |  | $\delta_C$             | $\delta_H$ (J in Hz) |
| 1         | 171.4      |                          |  | 170.7                  |                      |
| 2         | 57.9       | 4.36, dd (7.8, 2.0)      |  | 57.6                   | 4.39, dd (7.9, 2.0)  |
| 2-NH      |            | 7.27, d (7.8)            |  |                        | 7.17, d (7.9)        |
| 3         | 79.0       | 3.57, m                  |  | 78.7                   | 3.67, m              |
| 3-OH      |            | 6.91, d(4.4)             |  |                        | 6.76, d (3.9)        |
| 4         | 31.0       | 1.93, m                  |  | 30.6                   | 1.96, m              |
| 5         | 18.7       | 0.84, d (6.8)            |  | 20.6                   | 1.16, d (6.3)        |
| 6         | 20.8       | 1.16, d (6.6)            |  | 18.6                   | 0.86, d (6.8)        |

(d)

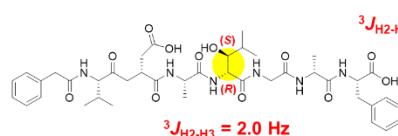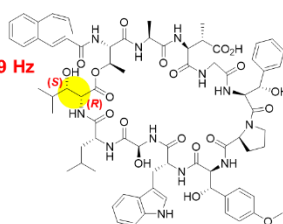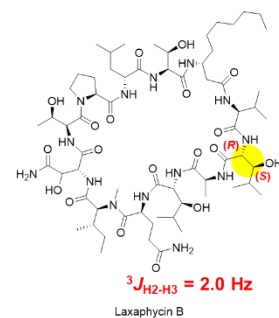

| Compounds |            | JBIR-78 <sup>i</sup>      |  | Skylamycin A <sup>k</sup> |                      | Laxaphycin B <sup>l</sup> |                      |
|-----------|------------|---------------------------|--|---------------------------|----------------------|---------------------------|----------------------|
| Position  | $\delta_C$ | $\delta_H$ (J in Hz)      |  | $\delta_C$                | $\delta_H$ (J in Hz) | $\delta_C$                | $\delta_H$ (J in Hz) |
| 1         | 168.4      |                           |  | 170.8                     |                      | 171.4                     |                      |
| 2         | 55.8       | 4.29, dd (8.2, 2.0)       |  | 56.1                      | 4.45, d (1.9)        | 55.2                      | 4.34, dd (9.1, 2.0)  |
| 2-NH      |            | 7.89, d (8.2)             |  |                           |                      |                           | 7.94, d (8.1)        |
| 3         | 76.3       | 3.53, dd (14.4, 2.0)      |  | 76.5                      | 3.79, dd (9.2, 1.8)  | 76.4                      | 3.49                 |
| 3-OH      |            |                           |  |                           |                      |                           |                      |
| 4         | 27.9       | 1.56, dq (14.4, 6.5, 6.5) |  | 32.3                      | 1.67, m              | 30.5                      | 1.58                 |
| 5         | 19.5       | 0.89, d (6.5)             |  | 19.2                      | 1.02, d (6.7)        | 19.2                      | 0.89                 |
| 6         | 19.1       | 0.72, d (6.5)             |  | 18.7                      | 0.83, d (6.7)        | 18.6                      | 0.76                 |

<sup>h</sup> NMR data were acquired in 600 MHz, CDCl<sub>3</sub><sup>i</sup> NMR data were acquired in 500 MHz, dioxane-*d*<sub>8</sub><sup>j</sup> NMR data were acquired in 600 MHz, DMSO-*d*<sub>6</sub><sup>k</sup> NMR data were acquired in 500 MHz, CD<sub>3</sub>OD<sup>l</sup> NMR data were acquired in 500 MHz, DMSO

**Table S3.** Experimental and calculated chemical shifts of the partial structure of the epoxinamide (1).

| Position            | Experimental<br>chemical shifts | Calculated<br>chemical shifts of 1a | Calculated<br>chemical shifts of 1b |
|---------------------|---------------------------------|-------------------------------------|-------------------------------------|
| C-51                | 169.2                           | 161.7                               | 162.1                               |
| C-52                | 124.6                           | 129.2                               | 129.6                               |
| C-53                | 136.7                           | 144.8                               | 143.2                               |
| C-54                | 134.1                           | 139.3                               | 140.4                               |
| C-55                | 126.9                           | 127.6                               | 128.8                               |
| C-56                | 127.8                           | 127.4                               | 127.9                               |
| C-57                | 129.6                           | 127.2                               | 126.8                               |
| C-58                | 124.4                           | 130.7                               | 131.0                               |
| C-59                | 136.7                           | 139.1                               | 138.8                               |
| C-60                | 54.8                            | 60.2                                | 61.0                                |
| C-61                | 58.9                            | 59.4                                | 59.2                                |
| C-62                | 17.6                            | 22.4                                | 22.3                                |
| H-52                | 6.94                            | 4.95                                | 5.08                                |
| H-53                | 8.11                            | 7.29                                | 7.26                                |
| H-55                | 7.42                            | 6.47                                | 6.52                                |
| H-56                | 7.00                            | 6.67                                | 6.67                                |
| H-57                | 7.33                            | 6.79                                | 6.77                                |
| H-58                | 7.09                            | 6.97                                | 6.86                                |
| H-60                | 4.07                            | 2.78                                | 2.86                                |
| H-61                | 2.97                            | 2.04                                | 2.27                                |
| H <sub>3</sub> -62a | 1.37                            | 0.65                                | 0.73                                |
| H <sub>3</sub> -62b | 1.37                            | 0.92                                | 1.18                                |
| H <sub>3</sub> -62c | 1.37                            | 1.06                                | 0.80                                |

**Figure S16.** Results of DP4 calculation for the partial structure of the epoxinnamide (1).

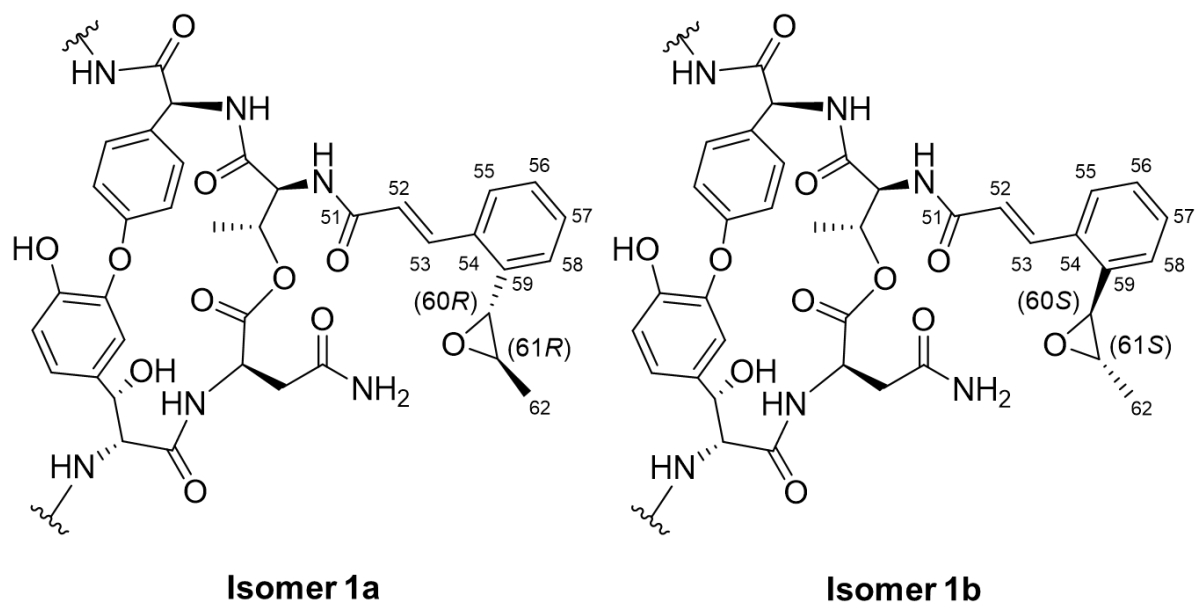

|                                                   |                                            |
|---------------------------------------------------|--------------------------------------------|
| Results of DP4 using both carbon and proton data: |                                            |
| Isomer 1a: 0.3%                                   |                                            |
| Isomer 1b: 99.7%                                  |                                            |
| Results of DP4 using the carbon data only:        | Results of DP4 using the proton data only: |
| Isomer 1a: 39.3%                                  | Isomer 1a: 0.5%                            |
| Isomer 1b: 60.7%                                  | Isomer 1b: 99.5%                           |



**Table S4.** AntiSMASH output table of the *Streptomyces* sp. OID44.

| Region    | Type                         | From      | To        | Most similar known cluster                                |                                                                   | Similarity |
|-----------|------------------------------|-----------|-----------|-----------------------------------------------------------|-------------------------------------------------------------------|------------|
| Region 1  | NRPS                         | 2         | 50,236    | mycotrienin I                                             | NRP + Polyketide                                                  | 7%         |
| Region 2  | PKS-like, terpene            | 277,029   | 323,778   | rustmicin                                                 | Polyketide: Iterative type I                                      | 20%        |
| Region 3  | terpene                      | 454,797   | 476,446   | tiancilactone                                             | Terpene                                                           | 17%        |
| Region 4  | NRPS                         | 506,589   | 583,445   | dechlorocuracomycin                                       | NRP                                                               | 8%         |
| Region 5  | RiPP-like                    | 588,129   | 595,973   |                                                           |                                                                   |            |
| Region 6  | T1PKS,hglE-KS                | 603,812   | 653,884   | leinamycin                                                | NRP + Polyketide: Modular type I +<br>Polyketide: Trans-AT type I | 2%         |
| Region 7  | NRPS-like                    | 691,682   | 732,097   |                                                           |                                                                   |            |
| Region 8  | T1PKS,NRPS                   | 793,093   | 899,371   | meridamycin                                               | NRP + Polyketide                                                  | 52%        |
| Region 9  | terpene                      | 1,069,327 | 1,089,448 | 2-methylisoborneol                                        | Terpene                                                           | 100%       |
| Region 10 | terpene                      | 1,192,137 | 1,211,829 | pristinol                                                 | Terpene                                                           | 100%       |
| Region 11 | NRPS-like,T1PKS              | 1,667,210 | 1,710,563 | amipurimycin                                              | Polyketide                                                        | 90%        |
| Region 12 | T1PKS                        | 1,917,850 | 2,000,720 | lydicamycin                                               | NRP + Polyketide: Modular type I                                  | 28%        |
| Region 13 | lanthipeptide-class-iii      | 2,100,735 | 2,123,356 | lipopolysaccharide                                        | Saccharide: Lipopolysaccharide                                    | 5%         |
| Region 14 | butyrolactone                | 2,470,261 | 2,479,489 |                                                           |                                                                   |            |
| Region 15 | blactam                      | 2,497,249 | 2,520,539 | valclavam / (-)-2-(2-hydroxy-ethyl)clavam                 | Other: Non-NRP beta-lactam                                        | 57%        |
| Region 16 | transAT-PKS,NRPS-like        | 2,650,736 | 2,727,582 | cycloheximide                                             | Polyketide: Trans-AT type I                                       | 50%        |
| Region 17 | T1PKS,siderophore            | 2,965,637 | 3,019,200 | apoptolidin                                               | Polyketide                                                        | 23%        |
| Region 18 | ectoine                      | 3,188,487 | 3,198,891 | ectoine                                                   | Other                                                             | 100%       |
| Region 19 | terpene                      | 3,668,388 | 3,688,250 |                                                           |                                                                   |            |
| Region 20 | lanthipeptide-class-i        | 3,889,210 | 3,914,169 |                                                           |                                                                   |            |
| Region 21 | T1PKS                        | 4,238,573 | 4,414,560 | mediomycin A                                              | Polyketide                                                        | 56%        |
| Region 22 | RRE-containing               | 4,543,122 | 4,563,992 | granaticin                                                | Polyketide: Type II                                               | 10%        |
| Region 23 | ladderane                    | 4,576,517 | 4,616,468 | atratumycin                                               | NRP                                                               | 31%        |
| Region 24 | NRPS                         | 4,661,153 | 4,704,484 | ochronotic pigment                                        | Other                                                             | 75%        |
| Region 25 | indole                       | 4,904,436 | 4,925,581 | 5-isoprenylindole-3-carboxylate $\beta$ -D-glycosyl ester | Other                                                             | 61%        |
| Region 26 | NRPS, arylpolyene, ladderane | 5,206,961 | 5,308,896 | atratumycin                                               | NRP                                                               | 57%        |
| Region 27 | terpene                      | 5,523,184 | 5,543,637 | geosmin                                                   | Terpene                                                           | 100%       |

|           |                       |            |            |                                                                      |                                                       |      |
|-----------|-----------------------|------------|------------|----------------------------------------------------------------------|-------------------------------------------------------|------|
| Region 28 | siderophore           | 6,549,359  | 6,560,846  | desferrioxamin B                                                     | Other                                                 | 100% |
| Region 29 | terpene               | 6,848,342  | 6,871,979  | carotenoid                                                           | Terpene                                               | 63%  |
| Region 30 | NRPS-like             | 7,064,128  | 7,106,889  | echoside A / echoside B /<br>echoside C / echoside D /<br>echoside E | NRP                                                   | 100% |
| Region 31 | siderophore           | 7,714,788  | 7,726,701  |                                                                      |                                                       |      |
| Region 32 | RiPP-like             | 7,940,469  | 7,951,776  |                                                                      |                                                       |      |
| Region 33 | redox-cofactor        | 8,080,073  | 8,100,903  |                                                                      |                                                       |      |
| Region 34 | T2PKS                 | 8,180,420  | 8,252,935  | spore pigment                                                        | Polyketide                                            | 83%  |
| Region 35 | betalactone           | 8,326,913  | 8,359,347  |                                                                      |                                                       |      |
| Region 36 | terpene               | 8,526,395  | 8,552,921  | hopene                                                               | Terpene                                               | 76%  |
| Region 37 | lanthipeptide-class-i | 8,739,188  | 8,763,626  | steffimycin D                                                        | Polyketide: Type II + Saccharide:<br>Hybrid/tailoring | 16%  |
| Region 38 | other                 | 8,769,851  | 8,811,938  | mitomycin                                                            | Other: Aminocoumarin                                  | 18%  |
| Region 39 | NRPS                  | 8,815,104  | 8,892,129  | atratumycin                                                          | NRP                                                   | 10%  |
| Region 40 | T1PKS                 | 8,980,397  | 9,028,143  |                                                                      |                                                       |      |
| Region 41 | butyrolactone         | 9,200,735  | 9,211,667  |                                                                      |                                                       |      |
| Region 42 | hserlactone           | 9,222,163  | 9,242,921  | daptomycin                                                           | NRP                                                   | 3%   |
| Region 43 | redox-cofactor        | 9,374,199  | 9,396,401  | lankacidin C                                                         | NRP + Polyketide                                      | 13%  |
| Region 44 | T1PKS                 | 9,428,122  | 9,502,432  | elaiophylin                                                          | Polyketide                                            | 87%  |
| Region 45 | T1PKS                 | 9,638,180  | 9,768,523  | nigericin                                                            | Polyketide: Modular type I                            | 100% |
| Region 46 | T1PKS                 | 9,938,825  | 10,085,447 | niphimycins C-E                                                      | Polyketide                                            | 87%  |
| Region 47 | NRPS-like             | 10,202,198 | 10,242,871 | BD-12                                                                | NRP                                                   | 67%  |
| Region 48 | NRPS                  | 10,322,317 | 10,373,224 | coelichelin                                                          | NRP                                                   | 90%  |
| Region 49 | CDPS                  | 10,398,124 | 10,418,870 | bicyclomycin                                                         | Other: tRNA-derived                                   | 100% |

**Table S5.** Deduced functions of ORFs in the epoxinamide (1) biosynthetic gene cluster from the *Streptomyces* sp. OID44 [21].

| ORF          | Size (aa) | Annotation based on BLASTP                  |                  |          | Homologues from <i>dml</i> gene cluster |          |
|--------------|-----------|---------------------------------------------|------------------|----------|-----------------------------------------|----------|
|              |           | Proposed function                           | Accession number | Identity | Homo-<br>logues                         | Identity |
| <i>orf1</i>  | 492       | trehalose-6-phosphate synthase              | WP_210565462.1   | 100%     |                                         |          |
| <i>orf2</i>  | 288       | trehalose phosphatase                       | KUL65503.1       | 99%      |                                         |          |
| <i>orf3</i>  | 100       | DUF3263 domain-containing protein           | WP_236669589.1   | 100%     |                                         |          |
| <i>orf4</i>  | 427       | extracellular solute-binding protein        | WP_210565464.1   | 100%     |                                         |          |
| <i>orf5</i>  | 319       | glucokinase                                 | SEC11617.1       | 99%      |                                         |          |
| <i>orf6</i>  | 394       | N-acetylglucosamine-6-phosphate deacetylase | WP_059142728.1   | 100%     |                                         |          |
| <i>orf7</i>  | 320       | 1-phosphofructokinase family hexose kinase  | WP_059142729.1   | 99%      |                                         |          |
| <i>orf8</i>  | 328       | carbohydrate-binding protein                | WP_237516519.1   | 98%      |                                         |          |
| <i>orf9</i>  | 562       | diguanylate cyclase CdgB                    | WP_059142731.1   | 100%     |                                         |          |
| <i>orf10</i> | 166       | flavin reductase family protein             | WP_079059208.1   | 100%     |                                         |          |
| <i>orf11</i> | 130       | aminoacyl-tRNA hydrolase                    | WP_059142733.1   | 100%     |                                         |          |
| <i>orf12</i> | 191       | TerD family protein                         | WP_059142734.1   | 100%     |                                         |          |
| <i>orf13</i> | 198       | Uma2 family endonuclease                    | WP_205587732.1   | 99%      |                                         |          |
| <i>orf14</i> | 193       | TetR family transcriptional regulator       | WP_093462714.1   | 95%      |                                         |          |
| <i>orf15</i> | 336       | NAD(P)-dependent alcohol dehydrogenase      | WP_086706493.1   | 100%     |                                         |          |
| <i>orf16</i> | 539       | M4 family metallopeptidase                  | WP_086706492.1   | 100%     |                                         |          |
| <i>orf17</i> | 361       | S-(hydroxymethyl)mycothiol dehydrogenase    | WP_059142739.1   | 100%     |                                         |          |
| <i>orf18</i> | 212       | MBL fold metallo-hydrolase                  | WP_086706490.1   | 100%     | <i>orf(-2)</i>                          | 95%      |
| <i>orf19</i> | 169       | flavin reductase family protein             | WP_059142741.1   | 100%     | <i>orf(-1)</i>                          | 88%      |
| <i>epcA</i>  | 4,775     | non-ribosomal peptide synthetase            | WP_059142742.1   | 100%     | <i>dmlA</i>                             | 78%      |
| <i>orf20</i> | 204       | hypothetical protein                        | WP_086710114.1   | 100%     |                                         |          |
| <i>epcB</i>  | 421       | cytochrome P450                             | WP_125755238.1   | 100%     | <i>dmlC</i>                             | 95%      |
| <i>epcC</i>  | 3,905     | non-ribosomal peptide synthetase            | WP_210565471.1   | 100%     | <i>dmlD</i>                             | 83%      |
| <i>epcD</i>  | 1,610     | non-ribosomal peptide synthetase            | WP_059142746.1   | 99%      | <i>dmlE</i>                             | 87%      |
| <i>epcE</i>  | 2,077     | non-ribosomal peptide synthetase            | WP_125755234.1   | 100%     | <i>dmlE</i>                             | 80%      |
| <i>epcF</i>  | 405       | cytochrome P450                             | WP_059142747.1   | 99%      | <i>dmlF</i>                             | 95%      |
| <i>epcG</i>  | 357       | LLM class flavin-dependent oxidoreductase   | WP_059142748.1   | 100%     | <i>dmlG</i>                             | 91%      |

|              |     |                                                                                                       |                |      |              |     |
|--------------|-----|-------------------------------------------------------------------------------------------------------|----------------|------|--------------|-----|
| <i>orf21</i> | 264 | ABC transporter permease                                                                              | WP_059142749.1 | 100% | <i>orf5</i>  | 95% |
| <i>orf22</i> | 324 | ABC transporter                                                                                       | KUL65527.1     | 100% | <i>orf6</i>  | 94% |
| <i>epcH</i>  | 408 | cytochrome P450                                                                                       | WP_125755230.1 | 100% | <i>dmlH</i>  | 93% |
| <i>epcI</i>  | 347 | <i>p</i> -hydroxymandelate synthase                                                                   | UNJ19134.1     | 91%  | <i>dmlI</i>  | 91% |
| <i>epcJ</i>  | 824 | <i>p</i> -hydroxyphenylglycine aminotransferase/<br><i>p</i> -hydroxymandelate oxidase fusion protein | UNJ19135.1     | 94%  | <i>dmlJ</i>  | 81% |
| <i>epcK</i>  | 369 | prephenate dehydrogenase                                                                              | WP_059142753.1 | 100% | <i>dmlK</i>  | 94% |
| <i>orf23</i> | 696 | AarF/UbiB family protein                                                                              | WP_059142754.1 | 100% | <i>orf17</i> | 93% |
| <i>orf24</i> | 68  | MbtH family protein                                                                                   | WP_044573519.1 | 100% | <i>orf18</i> | 94% |
| <i>epcL</i>  | 237 | Isomerase                                                                                             | MYV58306.1     | 77%  | <i>dmlL</i>  | 89% |
| <i>epcM</i>  | 248 | 3-oxoacyl-[acyl-carrier-protein] reductase                                                            | WP_086710106.1 | 100% | <i>dmlM</i>  | 95% |
| <i>epcN</i>  | 164 | beta-hydroxyacyl-ACP dehydratase                                                                      | WP_059142757.1 | 99%  | <i>dmlN</i>  | 90% |
| <i>epcO</i>  | 147 | dehydratase                                                                                           | KUL65536.1     | 100% |              |     |
| <i>epcP</i>  | 375 | 3-oxoacyl-ACP synthase                                                                                | WP_059142759.1 | 100% | <i>dmlO</i>  | 96% |
| <i>orf25</i> | 339 | hypothetical protein                                                                                  | WP_125755222.1 | 100% | <i>orf20</i> | 97% |
| <i>orf26</i> | 307 | alpha/beta hydrolase                                                                                  | WP_125755219.1 | 100% | <i>orf21</i> | 91% |
| <i>epcQ</i>  | 314 | 3-oxoacyl-ACP synthase                                                                                | WP_059142762.1 | 100% | <i>dmlP</i>  | 91% |
| <i>epcR</i>  | 377 | 3-oxoacyl-ACP synthase                                                                                | WP_059142763.1 | 100% | <i>dmlQ</i>  | 96% |
| <i>epcS</i>  | 413 | beta-ketoacyl-[acyl-carrier-protein] synthase family protein                                          | WP_059142764.1 | 100% | <i>dmlR</i>  | 97% |
| <i>epcT</i>  | 83  | acyl carrier protein                                                                                  | WP_014061562.1 | 100% | <i>dmlS</i>  | 99% |

**Figure S17.** Biosynthetic functions of the cytochrome P450s and the thioesterase domains in epoxinnamide (1), nyuzenamide C, skyllamycin A, atratumycin, and telomycin [15,21,33,34].

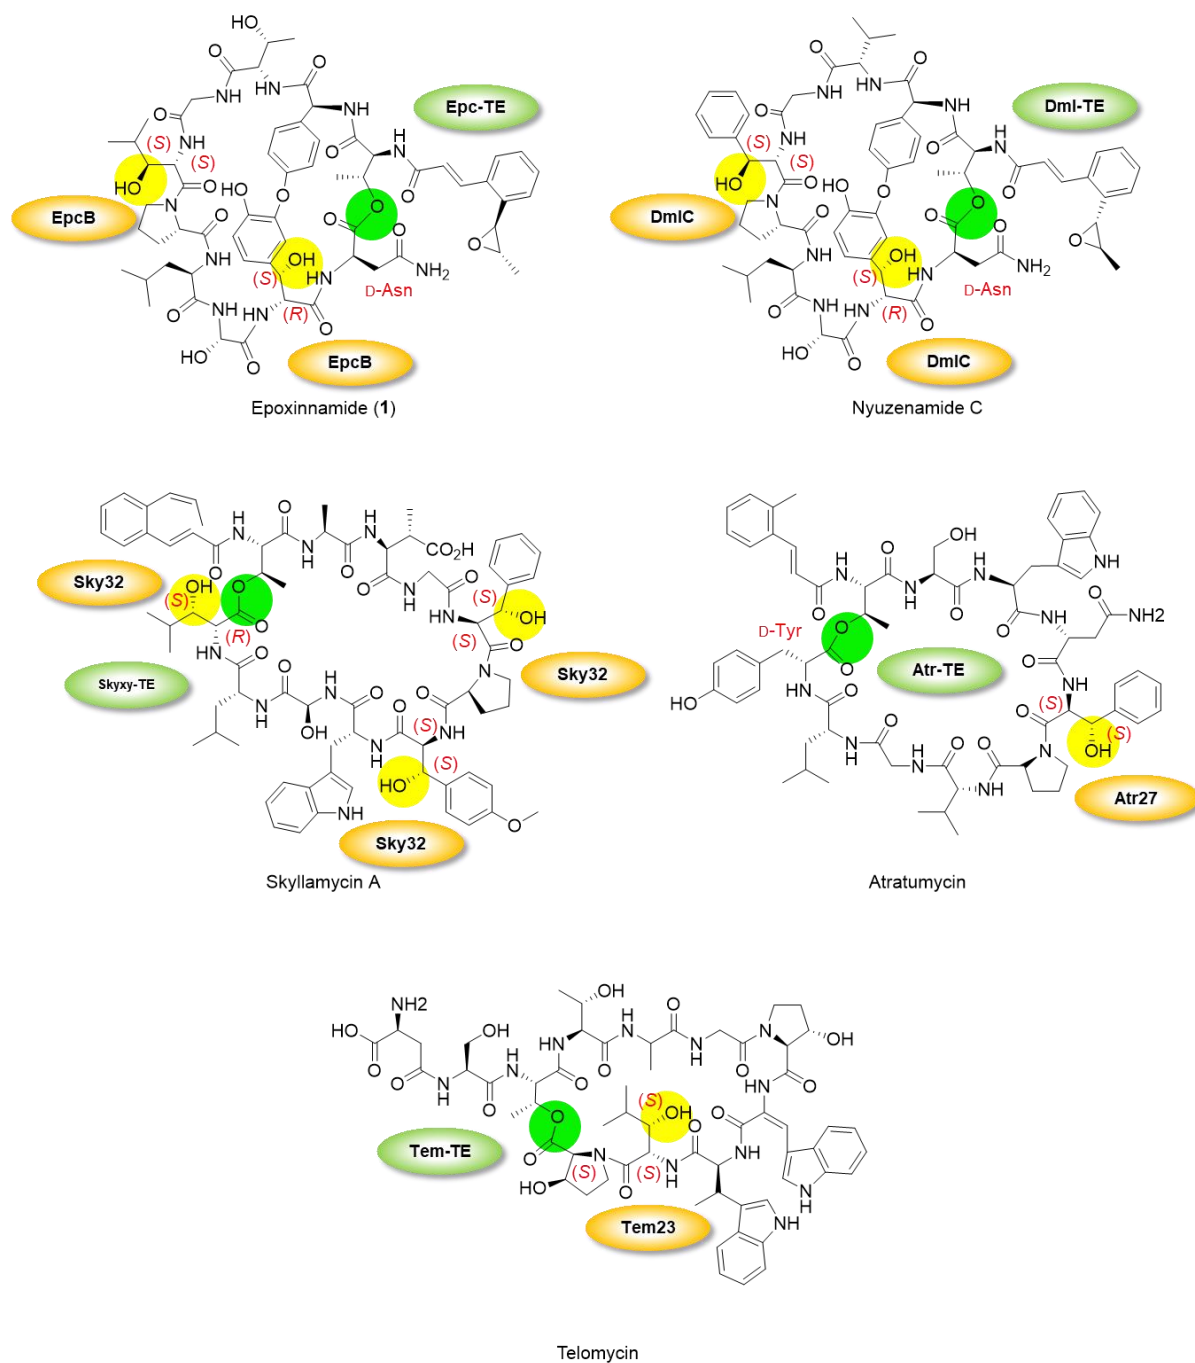

**(a)**

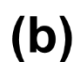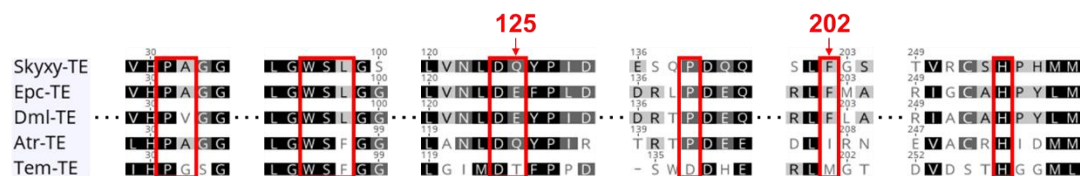

**Figure S19.** Proposed structural models of thioesterase domains, active site residues surrounding catalytic Ser residue, and key active sites for dual function of (a) Epc-TE, (b) Dml-TE, (c) Atr-TE, and (d) Tel-TE. Epc-TE, Dml-TE, and Atr-TE have homologous active site structures.

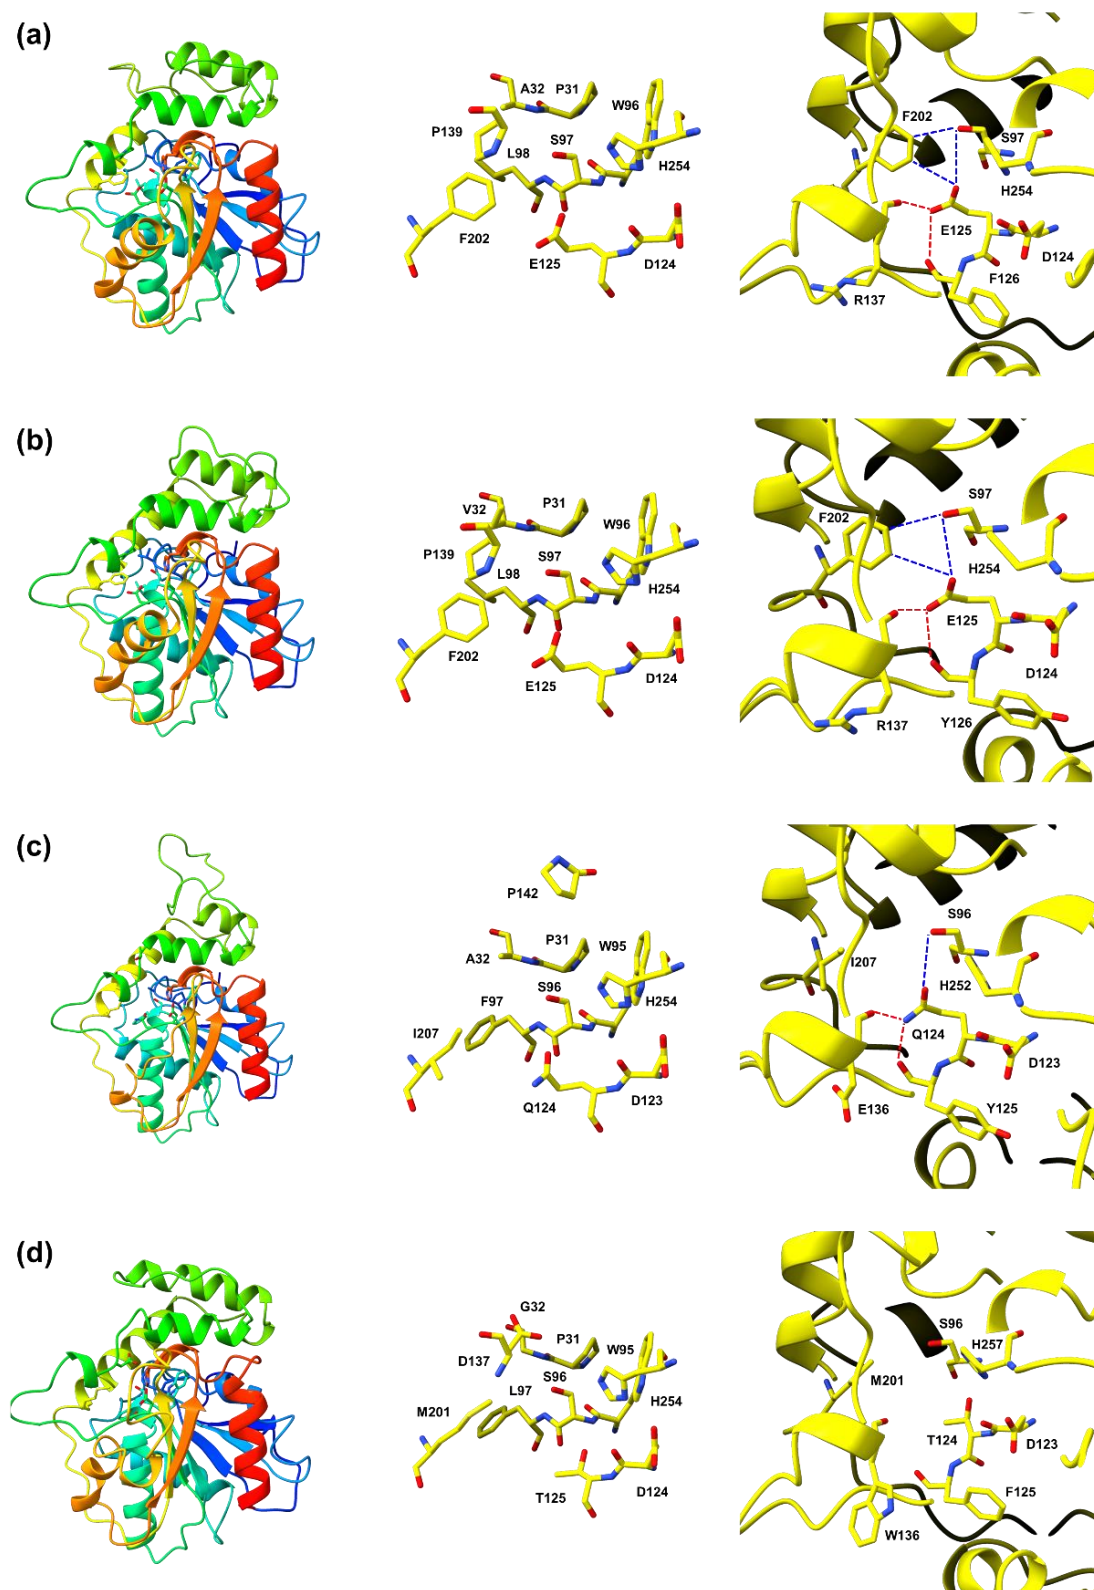



**Figure S20.** Sequence alignment of the EpcB with the other cytochrome P450s [15,21,33,34]. Each shaded color means the similarity between sequences. Black = 100% similarity, dark gray = 80 to 100% similarity, gray = 60 to 80% similarity, white = less than 60% similarity.

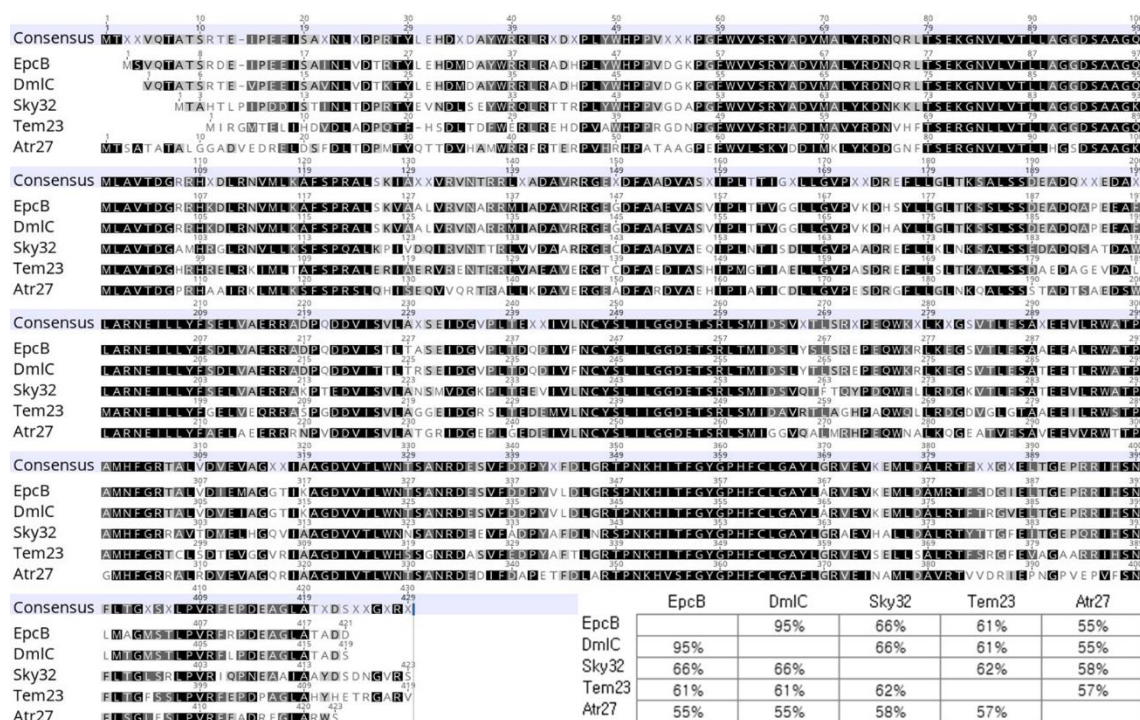



**Figure S21.** Phylogenetic analysis of the cytochrome P450  $\beta$ -hydroxylases which catalyze  $\beta$ -hydroxylation of amino acid. Amino acid sequences were collected from MIBiG (<https://mibig.secondarymetabolites.org/>, accessed on 12 July 2022) and NCBI (<https://www.ncbi.nlm.nih.gov/protein/>, accessed on 12 July 2022). Phylogenetic tree was built by Geneious Tree Builder. Cytochrome P450 monooxygenase CYP142 from *Mycobacterium tuberculosis* H37Rv (NP\_218035) was used as an out group (not shown). Branch labels represent the consensus support (%) estimated by bootstrap analysis with 1,000 replicates (support threshold 50%). The scale bar indicates the average number of substitutions per site. R = amino acid residues. Orf8 catalyzes *S*-hydroxylation of leucine unit, opposed to its position in the phylogenetic tree. Stereochemical information of NikQ and SanQ are not known. Cytochrome P450 monooxygenase for  $\beta$ -hydroxylation could be largely divided into two groups, 3*S*-hydroxylase and 3*R*-hydroxylase but there were some exceptions: NovI and OxyD are representative 3*R*-hydroxylase which catalyze  $\beta$ -hydroxylation of tyrosine residues in biosynthesis of aminocoumarin and glycopeptide antibiotics, respectively. However, these two enzymes belong to different clade in the phylogenetic tree. This observation decreases the reliability to deduce OH stereochemistry with the sequences of hydroxylases. Nonetheless, Sky32, EpcB, Tem23 and Atr27 belong to the 3*S*-hydroxylase clade. Especially, EpcB and DmlC are phylogenetically closely related to Sky32 which catalyzes *S*-stereoselective  $\beta$ -hydroxylation in PCP domain-dependent manner.

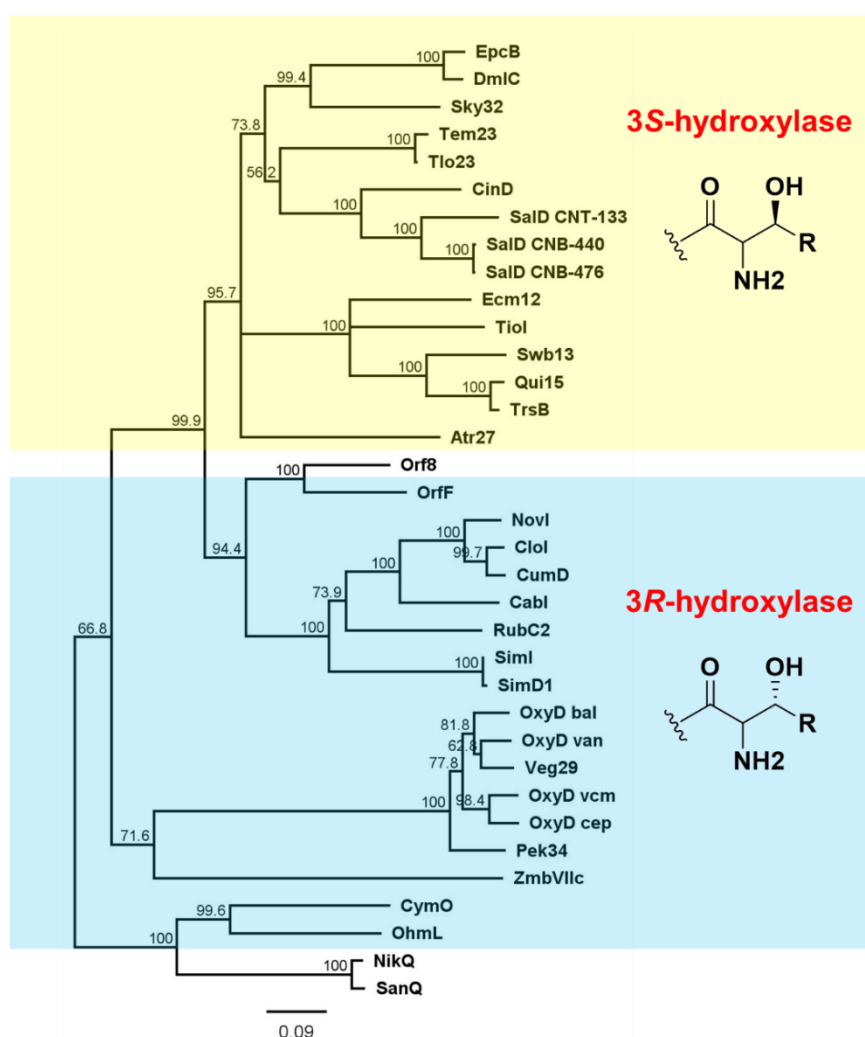

**Table S6.** List of the cytochrome P450  $\beta$ -hydroxylases implicated in the  $\beta$ -hydroxylation of amino acid residues. Amino acid substrates and final products are shown in the table.

| CYP450   | Accession Num | Amino acid substrates     | Final product                      | Stereo-chemistry |
|----------|---------------|---------------------------|------------------------------------|------------------|
| EpcB     | -             | Tyr, Leu                  | Epoxinamide                        | 3S               |
| DmlC     | UNJ19128      | Tyr, Phe                  | Nyuzenamide                        | 3S               |
| Sky32    | AEA30275      | Phe, OMe-Tyr, Leu         | Skyllamycin                        | 3S               |
| Tem23    | AKQ13298      | Leu                       | Telomycin                          | 3S               |
| Tlo23    | ALV86869      | Leu                       | Telomycin                          | 3S               |
| CinD     | CBW54674      | 3-cyclohex-2'-enylalanine | Cinnabaramide                      | 3S               |
| SalD     | ADZ28490      | 3-cyclohex-2'-enylalanine | Salinosporamide                    | 3S               |
| CNT-133  |               |                           |                                    |                  |
| SalD     | ABP53495      | 3-cyclohex-2'-enylalanine | Salinosporamide                    | 3S               |
| CNB-440  |               |                           |                                    |                  |
| SalD     | ABP73648      | 3-cyclohex-2'-enylalanine | Salinosporamide                    | 3S               |
| CNB-476  |               |                           |                                    |                  |
| Ecm12    | BAE98161      | Trp                       | Echinomycin                        | 3S               |
| TioI     | CAJ34365      | Trp                       | Thiocoraline                       | 3S               |
| Swb13    | BAI63285      | Trp                       | SW-163C                            | 3S               |
| Qui15    | AET98913      | Trp                       | Quinomycin                         | 3S               |
| TrsB     | BAH04170      | Trp                       | Triostin                           | 3S               |
| Atr27    | QBG38788      | Phe                       | Atratumycin                        | 3S               |
| Orf8     | BAX90002      | Leu                       | JBIR-78                            | 3S               |
| OrfF     | WP_067444944  | Leu                       | Cysteoamide                        | 3R               |
| NovI     | AAF67502      | Tyr                       | Novobiocin                         | 3R               |
| CloI     | AAN65225      | Tyr                       | Clorobiocin                        | 3R               |
| CumD     | AAG29781      | Tyr                       | Coumermycin                        | 3R               |
| CabI     | ACU71637      | Tyr                       | Cacibiocin                         | 3R               |
| RubC2    | CAI94719      | Tyr                       | Rubradirin                         | 3R               |
| SimI     | AAG34185      | Tyr                       | Simocyclinone                      | 3R               |
| SimD1    | AAK06805      | Tyr                       | Simocyclinone                      | 3R               |
| OxyD bal | CAC48370      | Tyr                       | Balhimycin                         | 3R               |
| OxyD van | CAA11772      | Tyr                       | Vancomycin                         | 3R               |
| Veg29    | ACJ60971      | Tyr                       | VEG type I glycopeptide antibiotic | 3R               |
| OxyD vcm | AEI58880      | Tyr                       | Vancomycin                         | 3R               |
| OxyD cep | CCD33151      | Tyr                       | Chloroeremomycin                   | 3R               |
| Pek34    | AGF91769      | Tyr                       | Pekiskomycin                       | 3R               |
| ZmbVIIc  | ACG60779      | Val                       | Zorbamycin                         | -                |
| CymO     | ABW00322      | Phe                       | Cyclomarin                         | 3R               |
| OhmL     | QGA70159      | Phe                       | Ohmyungsamycin                     | 3R               |
| NikQ     | CAB75339.1    | His                       | Nikkomycin                         | Unknown          |
| SanQ     | AAG48135      | His                       | Nikkomycin                         | Unknown          |

**Figure S22.** Phylogenetic tree and table of the ketosynthases in BGC of youssoufene and CCNPs (atratumycin, cinnapeptin, nyuzenamide C, epoxinamide, kitacinnamycin, skyllamycin A, WS9326A, pepticinnamin E, and coprisamide C) [36,37].

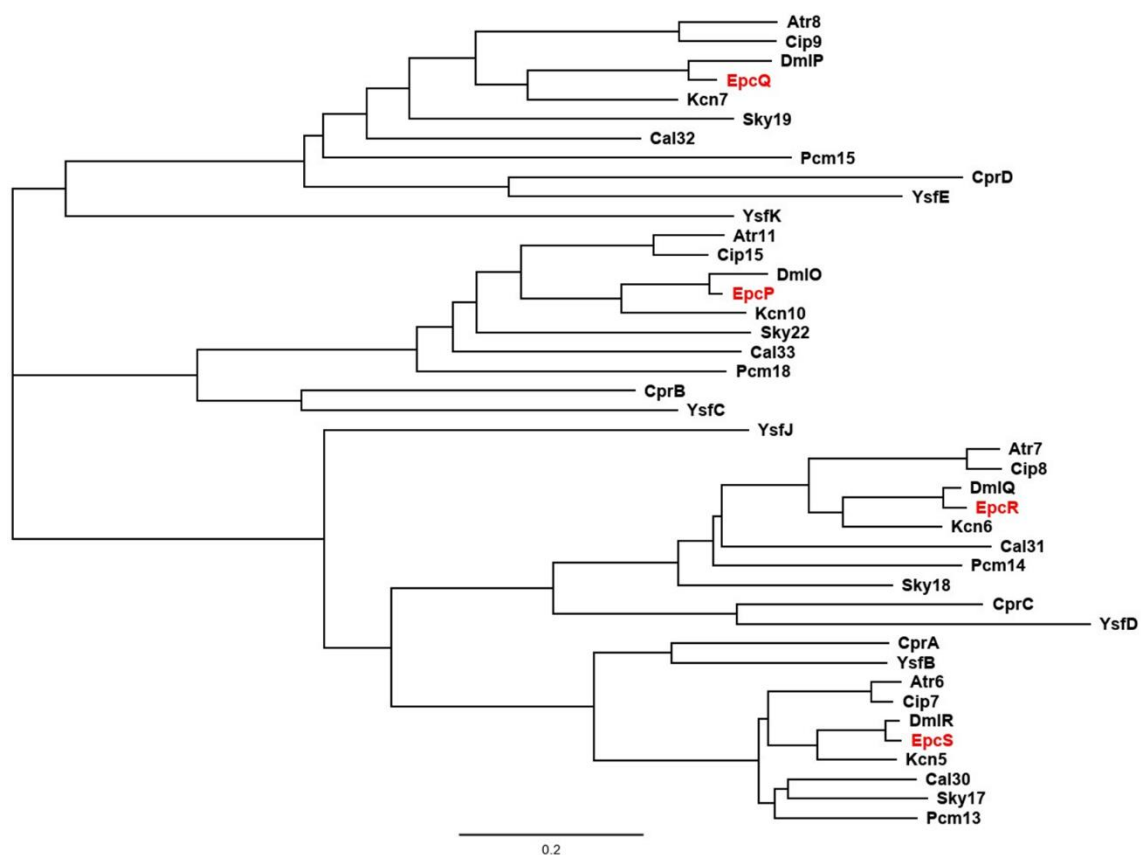

| Compounds       | KS <sub>1</sub> | CLF <sub>1</sub> | KS <sub>2</sub> | CLF <sub>2</sub> | KS <sub>3</sub> | CLF <sub>3</sub> |
|-----------------|-----------------|------------------|-----------------|------------------|-----------------|------------------|
| Youssoufene     | YsfB            | YsfC             | YsfD            | YsfE             | YsfJ            | YsfK             |
| Atratumycin     | Atr6            | Atr11            | Atr7            | Atr8             |                 |                  |
| Cinnapeptin     | Cip7            | Cip15            | Cip8            | Cip9             |                 |                  |
| Nyuzenamide C   | DmlR            | DmlO             | DmlQ            | DmlP             |                 |                  |
| Epoxinamide     | EpcS            | EpcP             | EpcR            | EpcQ             |                 |                  |
| Kitacinnamycin  | Kcn5            | Kcn10            | Kcn6            | Kcn7             |                 |                  |
| Skylamycin A    | Sky17           | Sky22            | Sky18           | Sky19            |                 |                  |
| WS9326A         | Cal30           | Cal33            | Cal31           | Cal32            |                 |                  |
| Pepticinnamin E | Pcm13           | Pcm18            | Pcm14           | Pcm15            |                 |                  |
| Coprisamide C   | CprA            | CprB             | CprC            | CprD             |                 |                  |

**Table S7.** Quinone reductase assay data of nyuzenamide C and epoxinamide (1).

| Sample                                    | Concentration | Average  | Standard Deviation |
|-------------------------------------------|---------------|----------|--------------------|
| Control                                   | 0             | 1        | 0.071686           |
| Nyuzenamide C ( $\mu\text{M}$ )           | 20            | 1.644478 | 0.152603           |
|                                           | 10            | 1.390253 | 0.157468           |
|                                           | 5             | 1.126734 | 0.035390           |
| Epoxinamide ( $\mu\text{M}$ )             | 5             | 1.605825 | 0.098615           |
|                                           | 2.5           | 1.357639 | 0.099641           |
|                                           | 1.25          | 1.170649 | 0.072016           |
| $\beta$ -naphthoflavone ( $\mu\text{M}$ ) | 2             | 2.213906 | 0.021521           |

**Table S8.** Cell viability data of nyuzenamide C and epoxinamide (1).

| Sample                                    | Concentration | Average  | Standard Deviation |
|-------------------------------------------|---------------|----------|--------------------|
| Control                                   | 0             | 1        | 0.125867           |
| Nyuzenamide C ( $\mu\text{M}$ )           | 20            | 0.943992 | 0.071223           |
|                                           | 10            | 1.041755 | 0.026192           |
|                                           | 5             | 1.089161 | 0.065328           |
| Epoxinamide ( $\mu\text{M}$ )             | 5             | 0.963808 | 0.084109           |
|                                           | 2.5           | 0.975457 | 0.067945           |
|                                           | 1.25          | 1.054388 | 0.033515           |
| $\beta$ -naphthoflavone ( $\mu\text{M}$ ) | 2             | 0.998161 | 0.012416           |

**Table S9.** In vitro capillary tube formation assay data of nyuzenamide C and epoxinamide (1).

| Concentration ( $\mu\text{M}$ ) | Average of Total Segments Length | Tube Formation (%) |
|---------------------------------|----------------------------------|--------------------|
| VEGF +                          | 5223.67                          | 100                |
| VEGF -                          | 2307.22                          | 44.17              |
| Nyuzenamide C, 20               | 2625.02                          | 50.25              |
| Nyuzenamide C, 10               | 3715.86                          | 71.14              |
| Nyuzenamide C, 5                | 4877.50                          | 93.37              |
| Epoxinamide, 20                 | 3219.53                          | 61.63              |
| Epoxinamide, 10                 | 4180.46                          | 80.03              |
| Epoxinamide, 5                  | 5029.67                          | 96.29              |
| Sunitinib, 4                    | 2943.54                          | 56.35              |
| Sunitinib, 2                    | 3595.32                          | 68.83              |
| Sunitinib, 1                    | 4538.97                          | 86.89              |

## References

1. Fischbach, M.A.; Walsh, C.T. Assembly-Line Enzymology for Polyketide and Nonribosomal Peptide Antibiotics: Logic, Machinery, and Mechanisms. *Chem. Rev.* **2006**, *106*, 3468–3496, doi:10.1021/cr0503097.
2. Hayashi, K.; Hashimoto, M.; Shigematsu, N.; Nishikawa, M.; Ezaki, M.; Yamashita, M.; Kiyoto, S.; Okuhara, M.; Kohsaka, M.; Imanaka, H. WS9326A, a Novel Tachykinin Antagonist Isolated from *Streptomyces violaceusniger* No. 9326. I. Taxonomy, Fermentation, Isolation, Physico-chemical Properties and Biological Activities. *J. Antibiot. (Tokyo)* **1992**, *45*, 1055–1063, doi.org/10.7164/antibiotics.45.1064.
3. Zhang, S.; Zhu, J.; Zechel, D.L.; Jessen-Trefzer, C.; Eastman, R.T.; Paululat, T.; Bechthold, A. New WS9326A Derivatives and One New Annimycin Derivative with Antimalarial Activity are Produced by *Streptomyces asterosporus* DSM 41452 and Its Mutant. *Chembiochem* **2018**, *19*, 272–279, doi.org/10.1002/cbic.201700428.
4. Yu, Z.; Vodanovic-Jankovic, S.; Kron, M.; Shen, B. New WS9326A Congeners from *Streptomyces* sp. 9078 Inhibiting *Brugia malayi* Asparaginyl-tRNA Synthetase. *Org. Lett.* **14**, 4946–4949, doi.org/10.1021/ol302298k.
5. Bae, M.; Oh, J.; Bae, E.S.; Oh, J.; Hur, J.; Suh, Y.-G.; Lee, S.K.; Shin, J.; Oh, D.-C. WS9326H, an Antiangiogenic Pyrazolone-Bearing Peptide from an Intertidal Mudflat Actinomycete. *Org. Lett.* **2018**, *20*, 1999–2002, doi:10.1021/acs.orglett.8b00546.
6. Shiomi, K.; Yang, H.; Inokoshi, J.; Van der Pyl, D.; Nakagawah, A.; Takeshima, H.; Omura, S. Peptidocinnamins, New Farnesyl-protein Transferase Inhibitors Produced by an Actinomycete. II. Structural Elucidation of Peptidocinnamin E. *J. Antibiot. (Tokyo)* **1993**, *46*, 229–234, doi.org/10.7164/antibiotics.46.229.
7. Toki, S.; Agatsuma, T.; Ochiai, K.; Saitoh, Y.; Ando, K.; Nakanishi, S.; Lokker, N.A.; Giese, N.A.; Matsuda, Y. RP-1776, a Novel Cyclic Peptide Produced by *Streptomyces* sp., inhibits the Binding of PDGF to the Extracellular Domain of Its Receptor. *J. Antibiot.* **2001**, *54*, 405–414. https://doi.org/10.7164/antibiotics.54.405.
8. Pohle, S.; Appelt, C.; Roux, M.; Fiedler, H.-P.; Süßmuth, R.D. Biosynthetic Gene Cluster of the Non-Ribosomally Synthesized Cyclodepsipeptide Skyllamycin: Deciphering Unprecedented Ways of Unusual Hydroxylation Reactions. *J. Am. Chem. Soc.* **2011**, *133*, 6194–6205, doi:10.1021/ja108971p.
9. Navarro, G.; Cheng, A.T.; Peach, K.C.; Bray, W.M.; Bernan, V.S.; Yildiz, F.H.; Linington, R.G. Image-Based 384-Well High-Throughput Screening Method for the Discovery of Skyllamycins A to C as Biofilm Inhibitors and Inducers of Biofilm Detachment in *Pseudomonas Aeruginosa*. *Antimicrob. Agents Chemother.* **2014**, *58*, 1092–1099, doi:10.1128/AAC.01781-13.
10. Bracegirdle, J.; Hou, P.; Nowak, V.V.; Ackerley, D.F.; Keyzers, R.A.; Owen, J.G. Skyllamycins D and E, Non-Ribosomal Cyclic Depsipeptides from Lichen-Sourced *Streptomyces anulatus*. *J. Nat. Prod.* **2021**, *84*, 2536–2543, doi:10.1021/acs.jnatprod.1c00547.
11. Zhang, F.; Adnani, N.; Vazquez-Rivera, E.; Braun, D.R.; Tonelli, M.; Andes, D.R.; Bugni, T.S. Application of 3D NMR for Structure Determination of Peptide Natural Products. *J. Org. Chem.* **2015**, *80*, 8713–8719, doi:10.1021/acs.joc.5b01486.
12. Zhang, C.; Seyedsayamdost, M.R. Discovery of a Cryptic Depsipeptide from *Streptomyces ghanaensis* via MALDI-MS-Guided High-Throughput Elicitor Screening. *Angew. Chem. Int. Ed.* **2020**, *132*, 23005–23009, doi:10.1002/anie.202009611.
13. Liu, M.; Liu, N.; Shang, F.; Huang, Y. Activation and Identification of NC-1: A Cryptic Cyclodepsipeptide from Red Soil-Derived *Streptomyces* sp. FXJ1.172. *European J. Org. Chem.* **2016**, *2016*, 3943–3948, doi:10.1002/ejoc.201600297.
14. Bae, M.; Kim, H.; Moon, K.; Nam, S.-J.; Shin, J.; Oh, K.-B.; Oh, D.-C. Mohangamides A and B, New Dilactone-Tethered Pseudo-Dimeric Peptides Inhibiting *Candida Albicans* Isocitrate Lyase. *Org. Lett.* **2015**, *17*, 712–715, doi:10.1021/ol5037248.
15. Sun, C.; Yang, Z.; Zhang, C.; Liu, Z.; He, J.; Liu, Q.; Zhang, T.; Ju, J.; Ma, J. Genome Mining of *Streptomyces atratus* SCSIO ZH16: Discovery of Atratumycin and Identification of Its Biosynthetic Gene Cluster. *Org. Lett.* **2019**, *21*, 1453–1457, doi:10.1021/acs.orglett.9b00208.
16. Liu, Q.; Liu, Z.; Sun, C.; Shao, M.; Ma, J.; Wei, X.; Zhang, T.; Li, W.; Ju, J. Discovery and Biosynthesis of Atrovimycin, an Antitubercular and Antifungal Cyclodepsipeptide Featuring Vicinal-Dihydroxylated Cinnamic Acyl Chain. *Org. Lett.* **2019**, *21*, 2634–2638, doi:10.1021/acs.orglett.9b00618.
17. Shi, J.; Liu, C.L.; Zhang, B.; Guo, W.J.; Zhu, J.; Chang, C.-Y.; Zhao, E.J.; Jiao, R.H.; Tan, R.X.; Ge, H.M. Genome Mining and Biosynthesis of Kitacinnamycins as a STING Activator. *Chem. Sci.* **2019**, *10*, 4839–4846, doi.org/10.1039/C9SC00815B.
18. Um, S.; Park, S.H.; Kim, J.; Park, H.J.; Ko, K.; Bang, H.-S.; Lee, S.K.; Shin, J.; Oh, D.-C. Coprisamides A and B, New Branched Cyclic Peptides from a Gut Bacterium of the Dung Beetle *Copris tripartitus*. *Org. Lett.* **2015**, *17*, 1272–1275, doi:10.1021/acs.orglett.5b00249.
19. Shin, Y.-H.; Ban, Y.H.; Kim, T.H.; Bae, E.S.; Shin, J.; Lee, S.K.; Jang, J.; Yoon, Y.J.; Oh, D.-C. Structures and Biosynthetic Pathway of Coprisamides C and D, 2-Alkenylcinnamic Acid-Containing Peptides from the Gut

- Bacterium of the Carrion Beetle *Silpha perforata*. *J. Nat. Prod.* **2021**, *84*, 239–246, doi:10.1021/acs.jnatprod.0c00864.
20. Karim, Md.R.U.; In, Y.; Zhou, T.; Harunari, E.; Oku, N.; Igarashi, Y. Nyuzenamides A and B: Bicyclic Peptides with Antifungal and Cytotoxic Activity from a Marine-Derived *Streptomyces* sp. *Org. Lett.* **2021**, *23*, 2109–2113, doi:10.1021/acs.orglett.1c00210.
  21. An, J.S.; Kim, M.-S.; Han, J.; Jang, S.C.; Im, J.H.; Cui, J.; Lee, Y.; Nam, S.-J.; Shin, J.; Lee, S.K.; Yoon, Y.J.; Oh, D.-C. Nyuzenamide C, an Antiangiogenic Epoxy Cinnamic Acid-Containing Bicyclic Peptide from a Riverine *Streptomyces* sp. *J. Nat. Prod.* **2022**, *85*, 804–814, doi:10.1021/acs.jnatprod.1c00837.
  22. Kumar, N.G.; Urry, D.W. Proton Magnetic Resonance Assignments of the Polypeptide Antibiotic Telomycin. *Biochemistry* **1973**, *12*, 3811–3817, doi:10.1021/bi00744a003.
  23. Wyche, T.P.; Ruzzini, A.C.; Beemelmans, C.; Kim, K.H.; Klassen, J.L.; Cao, S.; Poulsen, M.; Bugni, T.S.; Currie, C.R.; Clardy, J. Linear Peptides Are the Major Products of a Biosynthetic Pathway That Encodes for Cyclic Depsipeptides. *Org. Lett.* **2017**, *19*, 1772–1775, doi:10.1021/acs.orglett.7b00545.
  24. Raju, R.; Khalil, Z.G.; Piggott, A.M.; Blumenthal, A.; Gardiner, D.L.; Skinner-Adams, T.S.; Capon, R.J. Mollemycin A: An Antimalarial and Antibacterial Glyco-Hexadepsipeptide-Polyketide from an Australian Marine-Derived *Streptomyces* sp. (CMB-M0244). *Org. Lett.* **2014**, *16*, 1716–1719, doi:10.1021/ol5003913.
  25. McDonald, L.A.; Barbieri, L.R.; Carter, G.T.; Lenoy, E.; Lotvin, J.; Petersen, P.J.; Siegel, M.M.; Singh, G.; Williamson, R.T. Structures of the Muraymycins, Novel Peptidoglycan Biosynthesis Inhibitors. *J. Am. Chem. Soc.* **2002**, *124*, 10260–10261, doi:10.1021/ja017748h.
  26. Shimokawa, K.; Mashima, I.; Asai, A.; Ohno, T.; Yamada, K.; Kita, M.; Uemura, D. Biological Activity, Structural Features, and Synthetic Studies of (–)-Ternatin, a Potent Fat-Accumulation Inhibitor of 3T3-L1 Adipocytes. *Chem. Asian J.* **2008**, *3*, 438–446, doi:10.1002/asia.200700243.
  27. Nam, S.-J.; Kauffman, C.A.; Jensen, P.R.; Fenical, W. Isolation and Characterization of Actinoramides A–C, Highly Modified Peptides from a Marine *Streptomyces* sp. *Tetrahedron* **2011**, *67*, 6707–6712, doi:10.1016/j.tet.2011.04.051.
  28. Machida, K.; Arai, D.; Katsumata, R.; Otsuka, S.; Yamashita, J.K.; Ye, T.; Tang, S.; Fusetani, N.; Nakao, Y. Sameuramide A, a New Cyclic Depsipeptide Isolated from an Ascidian of the Family Didemnidae. *Bioorg. Med. Chem.* **2018**, *26*, 3852–3857, doi:10.1016/j.bmc.2018.06.042.
  29. Taniguchi, M.; Suzumura, K.; Nagai, K.; Kawasaki, T.; Takasaki, J.; Sekiguchi, M.; Moritani, Y.; Saito, T.; Hayashi, K.; Fujita, S.; Tsukamoto, S.-I.; Suzuki, K.-I. YM-254890 Analogues, Novel Cyclic Depsipeptides with Gαq/11 Inhibitory Activity from *Chromobacterium* sp. QS3666. *Bioorg. Med. Chem.* **2004**, *12*, 3125–3133, doi:10.1016/j.bmc.2004.04.006.
  30. Takeda, K.; Kemmoku, K.; Satoh, Y.; Ogasawara, Y.; Shin-ya, K.; Dairi, T. N -Phenylacetylation and Nonribosomal Peptide Synthetases with Substrate Promiscuity for Biosynthesis of Heptapeptide Variants, JBIR-78 and JBIR-95. *ACS Chem. Biol.* **2017**, *12*, 1813–1819, doi:10.1021/acschembio.7b00314.
  31. Giltrap, A.M.; Haeckl, F.P.J.; Kurita, K.L.; Linington, R.G.; Payne, R.J. Synthetic Studies Toward the Skyllamycins: Total Synthesis and Generation of Simplified Analogues. *J. Org. Chem.* **2018**, *83*, 7250–7270, doi:10.1021/acs.joc.8b00898.
  32. Boyaud, F.; Mahiout, Z.; Lenoir, C.; Tang, S.; Wdzieczak-Bakala, J.; Witczak, A.; Bonnard, I.; Banaigs, B.; Ye, T.; Inguibert, N. First Total Synthesis and Stereochemical Revision of Laxaphycin B and Its Extension to Lyngbyacyclamide A. *Org. Lett.* **2013**, *15*, 3898–3901, doi:10.1021/ol401645m.
  33. Uhlmann, S.; Süssmuth, R.D.; Cryle, M.J. Cytochrome P450<sub>sky</sub> Interacts Directly with the Nonribosomal Peptide Synthetase to Generate Three Amino Acid Precursors in Skyllamycin Biosynthesis. *ACS Chem. Biol.* **2013**, *8*, 2586–2596, doi:10.1021/cb400555e.
  34. Fu, C.; Keller, L.; Bauer, A.; Brönstrup, M.; Froidbise, A.; Hammann, P.; Herrmann, J.; Mondesert, G.; Kurz, M.; Schiell, M.; Schummer, D.; Toti, L.; Wink, J.; Müller, R. Biosynthetic Studies of Telomycin Reveal New Lipopeptides with Enhanced Activity. *J. Am. Chem. Soc.* **2015**, *137*, 7692–7705, doi:10.1021/jacs.5b01794.
  35. Yu, J.; Song, J.; Chi, C.; Liu, T.; Geng, T.; Cai, Z.; Dong, W.; Shi, C.; Ma, X.; Zhang, Z.; Ma, X.; Xing, B.; Jin, H.; Zhang, L.; Dong, S.; Yang, D.; Ma, M. Functional Characterization and Crystal Structure of the Bifunctional Thioesterase Catalyzing Epimerization and Cyclization in Skyllamycin Biosynthesis. *ACS Catal.* **2021**, *11*, 11733–11741, doi:10.1021/acscatal.1c03064.
  36. Deng, Z.; Liu, J.; Li, T.; Li, H.; Liu, Z.; Dong, Y.; Li, W. An Unusual Type II Polyketide Synthase System Involved in Cinnamoyl Lipid Biosynthesis. *Angew. Chem. Int. Ed.* **2021**, *133*, 153–158, doi:10.1002/anie.202007777.
  37. Shi, J.; Shi, Y.; Li, J.C.; Wei, W.; Chen, Y.; Cheng, P.; Liu, C.L.; Zhang, H.; Wu, R.; Zhang, B.; Jiao, R.H.; Yu, S.; Liang, Y.; Tan, R.X.; Ge, H.M. *In Vitro* Reconstitution of Cinnamoyl Moiety Reveals Two Distinct Cyclases for Benzene Ring Formation. *J. Am. Chem. Soc.* **2022**, *144*, 7939–7948, doi:10.1021/jacs.2c02855.
